# Supplementary material for: Microwave-assisted expeditious and efficient synthesis of novel quinolin-4-ylmethoxychromen-2- and -4-ones catalyzed by YbCl3under a solvent free one-pot three component domino reaction and their antimicrobial activity
Source: Royal Society of Chemistry journal article supplement (doi:10.1039/c5ra15748j), 2015-01-01

**Microwave-assisted expeditious and efficient synthesis of novel quinolin-4-yl methoxychromen-2- and -4-ones catalyzed by YbCl<sub>3</sub> under solvent free one-pot three components domino reaction and their antimicrobial activity**

Sumit Kumar,<sup>a</sup>Alok Patel<sup>b</sup> and Naseem Ahmed<sup>a,\*</sup>

<sup>a</sup>*Department of Chemistry, Indian Institute of Technology Roorkee, Roorkee 247 667, Uttarakhand, India.*

<sup>b</sup>*Department of Biotechnology, Indian Institute of Technology Roorkee, Roorkee 247 667, Uttarakhand, India.*

E-mail address: [nasemfcy@iitr.ac.in](mailto:nasemfcy@iitr.ac.in)

---

**SUPPORTING INFORMATION**

---

**Table of Contents**

|                                                       |                |
|-------------------------------------------------------|----------------|
| <b>General Information .....</b>                      | <b>S2</b>      |
| <b>Characterization Data .....</b>                    | <b>S2-S13</b>  |
| <b><sup>1</sup>H and <sup>13</sup>C Spectra .....</b> | <b>S14-S35</b> |

## General Information

Unless otherwise noted, chemicals were purchased from commercial suppliers at the highest purity grade available and were used without further purification. Solvents were distilled by standard methods. Thin layer chromatography was performed on Merck precoated 0.25 mm silica gel plates (60F-254) using UV light as visualizing agent and/or iodine as developing agent. Silica gel (100-200 mesh) was used for column chromatography. IR spectra were recorded on FT-IR spectrometer and expressed as wave numbers ( $\text{cm}^{-1}$ ).  $^1\text{H}$  and  $^{13}\text{C}$  NMR spectra were recorded on a BrukerAvance500&Jeol Resonance ECX 400 spectrometer. Spectra were referenced internally to the residual proton resonance in  $\text{CDCl}_3$  ( $\delta$  7.26 ppm) or with tetramethylsilane (TMS,  $\delta$  0.00 ppm) as the internal standard. Chemical shifts ( $\delta$ ) were reported as part per million (ppm) in  $\delta$  scale downfield from TMS.  $^{13}\text{C}$  NMR spectra were referenced to  $\text{CDCl}_3$  ( $\delta$  77.23 ppm, the middle peak). Spectra were processed using Bruker Topspin<sup>®</sup> 3.0.b.8. Coupling constants are expressed in Hz. The following abbreviations are used to explain the multiplicities: s = singlet, d = doublet, t = triplet, dd = doublet of doublets, m = multiplet, br = broad. High-resolution mass spectra (HRMS) were obtained on a Bruker micrOTOF<sup>™</sup>-Q II mass spectrometer (ESIMS).

## Characterization Data

### 2-(4-chlorophenyl)-3-((2-phenylquinolin-4-yl)methoxy)-4H-chromen-4-one (4a)

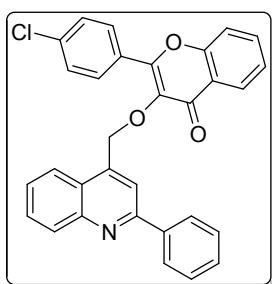

Yield: 95% as pale yellow liquid;  $^1\text{H}$  NMR (400 MHz,  $\text{CDCl}_3$ , ppm):  $\delta$  8.11 (d,  $J = 11$  Hz, 1H), 7.89-7.87 (m, 3H), 7.71-7.68 (m, 1H), 7.65-7.60 (m, 2H), 7.53 (d,  $J = 9.5$  Hz, 3H), 7.52-7.49 (m, 1H), 7.48-7.46 (m, 1H), 7.44-7.39 (m, 1H), 7.24-7.20 (m, 2H), 6.91-6.87 (m, 3H), 4.98 (s, 2H).  $^{13}\text{C}$  NMR (100 MHz,  $\text{CDCl}_3$ , ppm):  $\delta$  175.4, 158.5, 156.2, 155.3, 140.6, 138.7, 137.2, 136.3, 134.7, 134.1, 133.7, 130.4, 130.2, 129.9, 129.7, 129.3, 129.1, 128.8,

128.5, 125.9, 125.3, 123.8, 120.3, 118.2, 115.5, 86.3, 76.6. FTIR (KBr,  $\nu = \text{cm}^{-1}$ ): 3092, 3075, 2953, 2917, 1704, 1695, 1630, 1592, 1513, 1465, 1410, 1325, 1247, 1174, 1029. HRMS (ESI<sup>+</sup>):  $m/z$  calcd. for  $\text{C}_{31}\text{H}_{20}\text{ClNNaO}_3$   $[\text{M}+\text{Na}]^+$ : 512.1023, found: 512.1021.

**2-(4-chlorophenyl)-3-((6-(dimethylamino)-2-phenylquinolin-4-yl)methoxy)-4H-chromen-4-one (4b)**

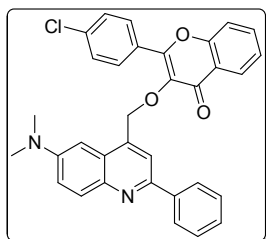

Yield: 94% as brownish semi-solid;  $^1\text{H}$  NMR (400 MHz,  $\text{CDCl}_3$ , ppm):  $\delta$  8.16 (dd,  $J = 2, 10$  Hz, 1H), 8.06 (d,  $J = 11$  Hz, 2H), 7.93 (dd,  $J = 1.5, 10$  Hz, 2H), 7.73 (dd,  $J = 2, 10.5$  Hz, 2H), 7.64-7.62 (m, 3H), 7.46 (d,  $J = 10$  Hz, 1H), 7.39 (d,  $J = 11$  Hz, 4H), 7.34-7.30 (m, 1H), 7.18 (s, 1H), 4.96 (s, 2H), 2.98 (s, 6H).  $^{13}\text{C}$  NMR (100 MHz,  $\text{CDCl}_3$ , ppm):  $\delta$  174.2, 160.4, 155.1, 155.0, 154.3, 152.5, 143.1, 141.5, 138.4, 136.7, 133.5, 131.5, 130.0, 129.8, 129.7, 129.0, 128.5, 125.5, 125.2, 124.8, 123.7, 118.0, 111.1, 110.8, 110.5, 86.3, 76.5, 42.1. FTIR (KBr,  $\nu = \text{cm}^{-1}$ ): 3090, 3072, 2949, 2915, 1705, 1692, 1625, 1594, 1515, 1460, 1412, 1303, 1244, 1176, 1029. HRMS (ESI<sup>+</sup>):  $m/z$  calcd. for  $\text{C}_{33}\text{H}_{25}\text{ClN}_2\text{NaO}_3$   $[\text{M}+\text{Na}]^+$ : 555.1445, found: 555.1432.

**2-(4-chlorophenyl)-3-((6-nitro-2-phenylquinolin-4-yl)methoxy)-4H-chromen-4-one (4c)**

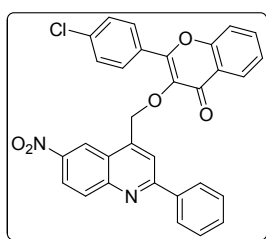

Yield: 91% as yellow semi-solid;  $^1\text{H}$  NMR (400 MHz,  $\text{CDCl}_3$ , ppm):  $\delta$  8.35 (d,  $J = 11$  Hz, 2H), 8.15 (dd,  $J = 1.5, 10$  Hz, 2H), 8.09-8.05 (m, 4H), 7.99 (d,  $J = 10$  Hz, 1H), 7.78 (dd,  $J = 1.5, 10.5$  Hz, 1H), 7.69-7.64 (m, 2H), 7.50-7.39 (m, 3H), 7.23-7.22 (m, 2H), 4.98 (s, 2H).  $^{13}\text{C}$  NMR (100 MHz,  $\text{CDCl}_3$ , ppm):  $\delta$  175.1, 160.5, 155.8, 155.5, 151.2, 146.2, 141.3, 140.2, 138.6, 136.8, 133.2, 133.6, 130.5, 130.2, 129.4, 129.0, 128.5, 125.6, 125.5, 125.1, 124.4, 123.9, 121.2, 118.3, 115.2, 86.3, 76.5. FTIR (KBr,  $\nu = \text{cm}^{-1}$ ): 3095, 3077, 2953, 2915, 1702, 1685, 1628, 1598, 1517, 1490, 1455, 1410, 1360, 1247, 1174, 1029. HRMS (ESI<sup>+</sup>):  $m/z$  calcd. for  $\text{C}_{31}\text{H}_{19}\text{ClN}_2\text{NaO}_5$   $[\text{M}+\text{Na}]^+$ : 557.0874, found: 557.0871.

### 3-((6-chloro-2-phenylquinolin-4-yl)methoxy)-2-(4-chlorophenyl)-4H-chromen-4-one (4d)

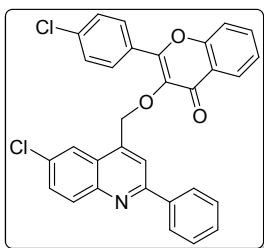

Yield: 89% as brownish semi-solid;  $^1\text{H NMR}$  (400 MHz,  $\text{CDCl}_3$ , ppm):  $\delta$  8.25 (dd,  $J = 2, 10$  Hz, 1H), 8.11 (d,  $J = 10.5$  Hz, 2H), 7.87 (d,  $J = 9$  Hz, 2H), 7.70-7.41 (m, 6H), 7.28 (d,  $J = 3$  Hz, 2H), 7.10 (dd,  $J = 3.5, 11$  Hz, 2H), 6.95 (d,  $J = 11$  Hz, 2H), 4.96 (s, 2H).  $^{13}\text{C NMR}$  (100 MHz,  $\text{CDCl}_3$ , ppm):  $\delta$  175.5, 161.4, 156.4, 155.3, 150.6, 138.7, 137.3, 136.2, 134.7, 134.1, 130.4, 130.2, 129.9, 129.2, 129.1, 128.8, 128.5, 128.4, 125.9, 125.4, 125.3, 123.7, 120.7, 118.1, 117.3, 86.5, 76.6. FTIR (KBr,  $\nu = \text{cm}^{-1}$ ): 3092, 3075, 2953, 2917, 1701, 1695, 1629, 1592, 1513, 1465, 1410, 1247, 1174, 1029. HRMS (ESI $^+$ ):  $m/z$  calcd. for  $\text{C}_{31}\text{H}_{19}\text{Cl}_2\text{NNaO}_3$   $[\text{M}+\text{Na}]^+$ : 546.0634, found: 546.0635.

### 2-(4-chlorophenyl)-3-((2-phenylbenzo[g]quinolin-4-yl)methoxy)-4H-chromen-4-one (4e)

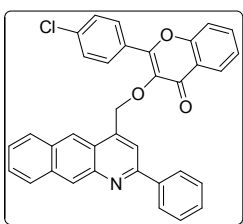

Yield: 86% as brownish semi-solid;  $^1\text{H NMR}$  (400 MHz,  $\text{CDCl}_3$ , ppm):  $\delta$  8.1-7.0 (m, 20 H), 4.83 (s, 2H).  $^{13}\text{C NMR}$  (100 MHz,  $\text{CDCl}_3$ , ppm):  $\delta$  175.7, 159.4, 156.5, 155.3, 153.9, 138.7, 137.3, 136.1, 134.8, 134.2, 133.7, 130.4, 130.2, 130.0, 129.7, 129.3, 129.1, 128.8, 128.5, 127.8, 126.5, 126.4, 125.8, 125.4, 123.4, 118.1, 109.5, 86.1, 76.8. FTIR (KBr,  $\nu = \text{cm}^{-1}$ ): 3098, 3055, 2955, 2919, 1701, 1686, 1627, 1594, 1517, 1462, 1410, 1247, 1174, 1029. HRMS (ESI $^+$ ):  $m/z$  calcd. for  $\text{C}_{35}\text{H}_{22}\text{ClNNaO}_3$   $[\text{M}+\text{Na}]^+$ : 562.1180, found: 562.1169.

### 2-(4-chlorophenyl)-3-((2-(4-(dimethylamino)phenyl)quinolin-4-yl)methoxy)-4H-chromen-4-one (4f)

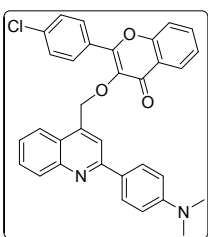

Yield: 84% as pale yellow semi-solid;  $^1\text{H NMR}$  (400 MHz,  $\text{CDCl}_3$ , ppm):  $\delta$  8.14 (dd,  $J = 2, 10$  Hz, 1H), 8.04 (d,  $J = 11$  Hz, 1H), 7.91 (dd,  $J = 1.5, 10$  Hz, 1H), 7.72 (dd,  $J = 2, 10.5$  Hz, 1H), 7.64-7.62 (m, 6H), 7.46 (d,  $J = 10$  Hz, 1H), 7.39 (d,  $J = 11$  Hz, 1H), 7.34-7.30 (m, 1H), 7.18-7.14 (m, 2H),

6.59 (d,  $J = 10$  Hz, 2H), 4.94 (s, 2H), 2.96 (s, 6H).  $^{13}\text{C}$  NMR (100 MHz,  $\text{CDCl}_3$ , ppm):  $\delta$  174.6, 160.3, 155.2, 155.0, 154.2, 152.7, 143.2, 141.7, 138.5, 136.7, 133.7, 133.4, 131.8, 130.1, 129.2, 129.0, 128.5, 125.5, 125.2, 124.8, 123.7, 118.0, 111.1, 110.8, 110.5, 86.0, 76.5, 39.9. FTIR (KBr,  $\nu = \text{cm}^{-1}$ ): 3092, 3075, 2953, 2917, 1703, 1695, 1630, 1592, 1513, 1465, 1410, 1247, 1174, 1029. HRMS (ESI<sup>+</sup>):  $m/z$  calcd. for  $\text{C}_{33}\text{H}_{25}\text{ClN}_2\text{NaO}_3$   $[\text{M}+\text{Na}]^+$ : 555.1445, found: 555.1441.

**2-(4-chlorophenyl)-3-((2-(4-nitrophenyl)quinolin-4-yl)methoxy)-4H-chromen-4-one (4g)**

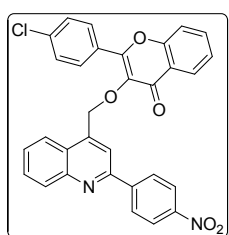

Yield: 95% as yellow semi-solid;  $^1\text{H}$  NMR (400 MHz,  $\text{CDCl}_3$ , ppm):  $\delta$  8.34 (d,  $J = 11$  Hz, 2H), 8.17 (dd,  $J = 1.5, 10$  Hz, 2H), 8.08-8.03 (m, 4H), 7.98 (d,  $J = 10$  Hz, 1H), 7.79 (dd,  $J = 1.5, 10.5$  Hz, 1H), 7.67-7.65 (m, 2H), 7.52-7.35 (m, 3H), 7.25-7.21 (m, 2H), 4.96 (s, 2H).  $^{13}\text{C}$  NMR (100

MHz,  $\text{CDCl}_3$ , ppm):  $\delta$  174.8, 160.9, 155.5, 155.2, 151.1, 146.5, 141.9, 140.0, 138.6, 136.9, 133.9, 133.5, 130.5, 130.3, 129.3, 129.1, 128.7, 125.7, 125.4, 125.0, 124.3, 123.9, 121.1, 118.1, 115.3, 86.2, 76.5. FTIR (KBr,  $\nu = \text{cm}^{-1}$ ): 3095, 3077, 2953, 2915, 1700, 1685, 1627, 1598, 1517, 1490, 1455, 1410, 1360, 1247, 1174, 1029. HRMS (ESI<sup>+</sup>):  $m/z$  calcd. for  $\text{C}_{31}\text{H}_{19}\text{ClN}_2\text{NaO}_5$   $[\text{M}+\text{Na}]^+$ : 557.0874, found: 557.0865.

**2-(4-chlorophenyl)-3-((2-(4-chlorophenyl)quinolin-4-yl)methoxy)-4H-chromen-4-one**

**(4h)**

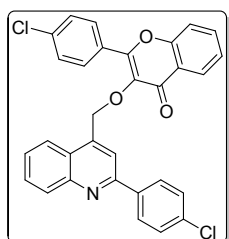

Yield: 88% as brownish semi-solid;  $^1\text{H}$  NMR (400 MHz,  $\text{CDCl}_3$ , ppm):  $\delta$  8.16 (d,  $J = 10$  Hz, 1H), 8.05 (d,  $J = 11$  Hz, 1H), 7.94 (d,  $J = 9.5$  Hz, 1H), 7.77-7.72 (m, 5H), 7.65-7.61 (m, 1H), 7.43-7.40 (m, 6H), 7.34 (t,  $J = 9.5$  Hz, 1H), 7.21-7.17 (m, 1H), 4.96 (s, 2H).  $^{13}\text{C}$  NMR (100 MHz,  $\text{CDCl}_3$ ,

ppm):  $\delta$  174.7, 161.4, 155.4, 155.1, 152.8, 144.8, 141.8, 140.8, 138.6, 136.8, 134.6, 133.8, 133.4, 130.8, 130.2, 129.4, 129.3, 129.0, 128.6, 125.6, 125.3, 124.9, 123.8, 121.1, 118.0, 86.2, 76.5. FTIR (KBr,  $\nu = \text{cm}^{-1}$ ): 3092, 3075, 2953, 2917, 1699, 1695, 1627, 1592, 1513,

1465, 1410, 1247, 1174, 1029. HRMS (ESI+):  $m/z$  calcd. for  $C_{31}H_{19}Cl_2NNaO_3$   $[M+Na]^+$ : 546.0634, found: 546.0634.

**2-(4-chlorophenyl)-3-((2-(4-methoxyphenyl)quinolin-4-yl)methoxy)-4H-chromen-4-one**

**(4i)**

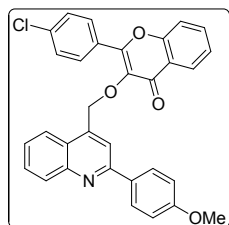

Yield: 86% as brownish semi-solid;  $^1H$  NMR (400 MHz,  $CDCl_3$ , ppm):  $\delta$  8.22 (dd,  $J = 1.5, 11.5$  Hz, 1H), 8.09 (dd,  $J = 2.5, 8.5$  Hz, 2H), 8.00 (dd,  $J = 1.5, 9.5$  Hz, 1H), 7.82-7.79 (m, 5H), 7.71-7.67 (m, 1H), 7.52 (d,  $J = 10.5$  Hz, 1H), 7.47-7.44 (m, 3H), 7.41-7.39 (m, 1H), 7.27-7.23 (m, 1H), 6.98 (s, 1H), 4.98 (s, 1H), 3.85 (s, 3H).  $^{13}C$  NMR (100 MHz,  $CDCl_3$ , ppm):  $\delta$  174.9, 164.7, 155.6, 155.3, 153.0, 151.0, 145.9, 142.0, 138.7, 137.0, 133.9, 133.5, 132.1, 130.4, 130.0, 129.5, 129.1, 128.8, 125.9, 125.5, 125.1, 124.0, 120.4, 118.1, 114.4, 86.3, 76.5, 55.7. FTIR (KBr,  $\nu = cm^{-1}$ ): 3089, 3067, 2950, 2916, 1702, 1695, 1629, 1592, 1513, 1425, 1410, 1246, 1174, 1029. HRMS (ESI+):  $m/z$  calcd. for  $C_{32}H_{22}ClNNaO_4$   $[M+Na]^+$ : 542.1129, found: 542.1118.

**2-(4-chlorophenyl)-3-((2-(p-tolyl)quinolin-4-yl)methoxy)-4H-chromen-4-one (4j)**

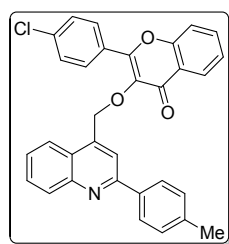

Yield: 90% as brownish semi-solid;  $^1H$  NMR (400 MHz,  $CDCl_3$ , ppm):  $\delta$  8.23 (dd,  $J = 1.5, 10$  Hz, 2H), 8.09 (d,  $J = 11$  Hz, 1H), 8.00 (dd,  $J = 1.5, 10$  Hz, 1H), 7.81 (dd,  $J = 1.5$  Hz, 10 Hz, 2H), 7.74 (d,  $J = 10.5$  Hz, 1H), 7.48-7.44 (m, 3H), 7.39 (t,  $J = 1.5$  Hz, 1H), 7.29 (d,  $J = 10$  Hz, 2H), 7.25-7.22 (m, 2H), 4.99 (s, 2H), 2.40 (s, 3H).  $^{13}C$  NMR (100 MHz,  $CDCl_3$ , ppm):  $\delta$  174.8, 158.5, 155.5, 155.2, 153.0, 148.1, 145.6, 143.4, 141.9, 138.7, 136.9, 134.2, 133.8, 133.5, 130.3, 129.9, 129.8, 129.4, 129.1, 128.7, 125.8, 125.4, 125.0, 123.9, 118.1, 86.3, 76.5, 21.9. FTIR (KBr,  $\nu = cm^{-1}$ ): 3092, 3075, 2953, 2917, 1705, 1695, 1630, 1592, 1513, 1465, 1410, 1247, 1174, 1029. HRMS (ESI+):  $m/z$  calcd. for  $C_{32}H_{22}ClNNaO_3$   $[M+Na]^+$ : 526.1180, found: 526.1183.

### 3-((6-chloro-2-(p-tolyl)quinolin-4-yl)methoxy)-2-(4-chlorophenyl)-4H-chromen-4-one

(4k)

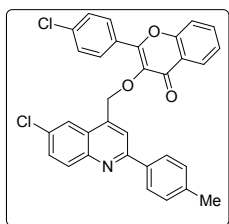

Yield: 89% as brownish semi-solid;  $^1\text{H}$  NMR (500 MHz,  $\text{CDCl}_3$ , ppm):  $\delta$  8.17 (m, 3H), 7.75 (d,  $J = 7.5$  Hz, 2H), 7.69 (t,  $J = 7$  Hz, 1H), 7.54-7.46 (m, 3H), 7.40 (t,  $J = 7.5$  Hz, 1H), 7.31-7.28 (m, 2H), 7.09 (d,  $J = 8$  Hz, 2H), 6.95 (d,  $J = 8.5$  Hz, 2H), 4.98 (s, 2H), 2.42 (s, 3H).  $^{13}\text{C}$  NMR (100

MHz,  $\text{CDCl}_3$ , ppm):  $\delta$  175.2, 156.0, 155.4, 150.8, 149.0, 145.9, 141.5, 138.8, 137.2, 134.2, 134.0, 130.4, 130.0, 129.8, 129.4, 129.0, 128.8, 128.3, 125.9, 125.3, 125.2, 123.9, 120.8, 118.2, 117.4, 86.4, 76.6, 22.0. FTIR (KBr,  $\nu = \text{cm}^{-1}$ ): 3096, 3075, 2959, 2915, 1698, 1695, 1630, 1592, 1513, 1465, 1410, 1247, 1174, 1029. HRMS (ESI<sup>+</sup>):  $m/z$  calcd. for  $\text{C}_{32}\text{H}_{21}\text{Cl}_2\text{NNaO}_3$  [ $\text{M}+\text{Na}$ ]<sup>+</sup>: 560.0790, found: 560.0785.

### 3-((6-chloro-2-(4-methoxyphenyl)quinolin-4-yl)methoxy)-2-(4-chlorophenyl)-4H-chromen-4-one (4l)

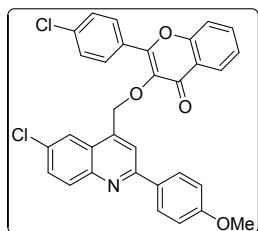

Yield: 85% as pale yellow semi-solid;  $^1\text{H}$  NMR (500 MHz,  $\text{CDCl}_3$ , ppm):  $\delta$  8.22-8.08 (m, 2H), 7.81-7.66 (m, 4H), 7.53-7.37 (m, 3H), 7.25 (s, 1H), 7.07 (d,  $J = 8$  Hz, 1H), 6.97-6.93 (m, 5H), 4.96 (s, 2H), 3.85 (s, 3H).  $^{13}\text{C}$  NMR (100 MHz,  $\text{CDCl}_3$ , ppm):  $\delta$  175.1, 164.8, 155.9,

155.3, 150.8, 145.7, 141.7, 138.7, 137.1, 135.6, 134.0, 132.2, 130.3, 129.8, 129.3, 129.0, 128.8, 128.2, 125.8, 125.2, 123.8, 120.8, 118.1, 117.4, 114.4, 87.0, 76.6, 55.6. FTIR (KBr,  $\nu = \text{cm}^{-1}$ ): 3092, 3075, 2953, 2917, 1701, 1695, 1628, 1592, 1513, 1465, 1410, 1247, 1174, 1029. HRMS (ESI<sup>+</sup>):  $m/z$  calcd. for  $\text{C}_{32}\text{H}_{21}\text{Cl}_2\text{NNaO}_4$  [ $\text{M}+\text{Na}$ ]<sup>+</sup>: 576.0739, found: 576.0735.

### 2-(4-chlorophenyl)-3-((2-(4-chlorophenyl)-6-(dimethylamino)quinolin-4-yl)methoxy)-4H-chromen-4-one (4m)

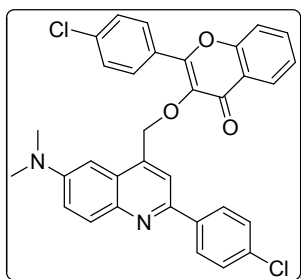

Yield: 90% as brownish semi-solid;  $^1\text{H}$  NMR (400 MHz,  $\text{CDCl}_3$ , ppm):  $\delta$  8.21-8.09 (m, 2H), 7.69-7.67 (m, 4H), 7.52-7.37 (m, 3H),

7.05-6.94 (m, 3H), 6.62 (d,  $J = 10$  Hz, 4H), 4.96 (s, 2H), 3.01 (s, 6H).  $^{13}\text{C}$  NMR (100 MHz,  $\text{CDCl}_3$ , ppm):  $\delta$  175.1, 155.9, 155.1, 154.5, 151.2, 145.2, 141.5, 138.6, 137.0, 134.0, 132.3, 130.3, 129.2, 129.0, 128.7, 128.0, 125.6, 125.1, 124.7, 124.5, 123.7, 121.0, 118.1, 117.4, 111.0, 86.3, 76.6, 39.9. FTIR (KBr,  $\nu = \text{cm}^{-1}$ ): 3092, 3075, 2953, 2917, 1701, 1695, 1629, 1592, 1513, 1465, 1410, 1247, 1174, 1029. HRMS (ESI<sup>+</sup>):  $m/z$  calcd. for  $\text{C}_{33}\text{H}_{24}\text{Cl}_2\text{N}_2\text{NaO}_3$   $[\text{M}+\text{Na}]^+$ : 589.1056, found: 589.1051.

**3-((6-dimethylamino-2-(ferrocenyl)quinolin-4-yl)methoxy)-2-(4-chlorophenyl)-4H-chromen-4-one (4n)**

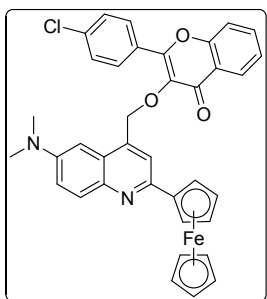

Yield: 85% as blackish semi-solid;  $^1\text{H}$  NMR (400 MHz,  $\text{CDCl}_3$ , ppm):  $\delta$  8.23 (dd,  $J = 1.5, 10$  Hz, 1H), 8.10 (dd,  $J = 2.5, 9$  Hz, 2H), 7.69-7.67 (m, 1H), 7.53 (d,  $J = 10.5$  Hz, 1H), 7.48-7.45 (m, 2H), 7.42-7.38 (m, 1H), 7.28 (d,  $J = 3$  Hz, 1H), 7.09 (dd,  $J = 3, 11$  Hz, 2H), 6.96 (s, 1H), 4.96 (s, 2H), 4.79 (t,  $J = 2.5$  Hz, 2H), 4.62 (t,  $J = 2.5$  Hz, 2H), 4.25 (s,

5H), 3.01 (s, 6H).  $^{13}\text{C}$  NMR (100 MHz,  $\text{CDCl}_3$ , ppm):  $\delta$  175.4, 156.2, 155.3, 150.8, 146.1, 142.3, 138.7, 137.2, 134.1, 130.4, 129.3, 128.9, 128.8, 128.3, 125.8, 125.3, 125.2, 123.8, 120.8, 118.1, 117.4, 87.2, 78.4, 76.9, 73.8, 70.0, 69.9, 42.5. FTIR (KBr,  $\nu = \text{cm}^{-1}$ ): 3102, 3092, 3078, 2956, 2915, 1703, 1695, 1630, 1592, 1513, 1465, 1410, 1247, 1174, 1029. HRMS (ESI<sup>+</sup>):  $m/z$  calcd. for  $\text{C}_{37}\text{H}_{29}\text{ClFeN}_2\text{NaO}_3$   $[\text{M}+\text{Na}]^+$ : 663.1108, found: 663.1102.

**2-(4-chlorophenyl)-3-((6-(dimethylamino)-2-(3,4,5-trimethoxyphenyl)quinolin-4-yl)methoxy)-4H-chromen-4-one (4o)**

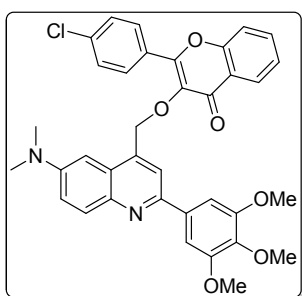

Yield: 86% as brownish semi-solid;  $^1\text{H}$  NMR (400 MHz,  $\text{CDCl}_3$ , ppm):  $\delta$  8.09 (dd,  $J = 3, 10$  Hz, 2H), 7.68-7.65 (m, 4H), 7.51-7.37 (m, 3H), 7.32-7.28 (m, 3H), 7.25 (s, 2H).  $^{13}\text{C}$  NMR (100 MHz,  $\text{CDCl}_3$ , ppm):  $\delta$  175.3, 156.2, 155.1, 151.0, 150.4, 147.1, 142.6, 140.0, 138.7, 137.3, 134.2, 132.4, 130.6, 130.4, 129.3, 128.8,



128.1, 125.7, 125.3, 125.1, 124.5, 123.5, 120.8, 118.1, 102.2, 86.5, 76.6, 61.0, 56.3, 42.2.  
FTIR (KBr,  $\nu = \text{cm}^{-1}$ ): 3092, 3075, 2953, 2917, 1699, 1695, 1627, 1592, 1513, 1465,  
1410, 1346, 1247, 1174, 1030. HRMS (ESI<sup>+</sup>):  $m/z$  calcd. for  $\text{C}_{36}\text{H}_{31}\text{ClN}_2\text{NaO}_6$   $[\text{M}+\text{Na}]^+$ :  
645.1762, found: 645.1756.

**3-((6-chloro-2-(4-nitrophenyl)quinolin-4-yl)methoxy)-2-(4-chlorophenyl)-4H-chromen-4-one (4p)**

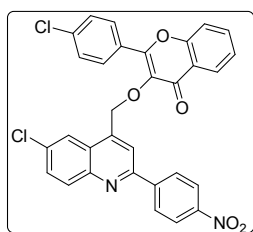

Yield: 94% as yellow liquid;  $^1\text{H}$  NMR (400 MHz,  $\text{CDCl}_3$ , ppm):  $\delta$  8.33 (dd,  $J = 2, 10.5$  Hz, 2H), 8.21 (d,  $J = 10.5$  Hz, 1H), 8.09-8.01 (m, 2H), 8.03-8.01 (m, 2H), 7.70-7.66 (m, 1H), 7.53 (d,  $J = 10.5$  Hz, 1H), 7.45 (dd,  $J = 3, 11$  Hz, 2H), 7.41-7.37 (m, 1H), 7.25-7.24 (m, 2H), 7.09-7.07 (m, 1H), 6.93 (d,  $J = 3$  Hz, 1H), 4.93 (s, 2H).  $^{13}\text{C}$  NMR (100 MHz,  $\text{CDCl}_3$ , ppm):  $\delta$  175.5, 156.4, 155.4, 151.2, 150.6, 147.0, 142.6, 140.0, 138.7, 137.3, 134.2, 132.4, 130.6, 130.4, 129.3, 128.8, 128.4, 125.9, 125.4, 125.3, 124.4, 123.7, 120.7, 118.2, 117.4, 87.6, 76.7. FTIR (KBr,  $\nu = \text{cm}^{-1}$ ): 3092, 3075, 2953, 2917, 1695, 1624, 1592, 1513, 1455, 1418, 1247, 1174, 1029. HRMS (ESI<sup>+</sup>):  $m/z$  calcd. for  $\text{C}_{31}\text{H}_{18}\text{Cl}_2\text{N}_2\text{NaO}_5$   $[\text{M}+\text{Na}]^+$ : 591.0484, found: 591.0475.

**2-(4-chlorophenyl)-3-((6-(dimethylamino)-2-(furan-2-yl)quinolin-4-yl)methoxy)-4H-chromen-4-one (4q)**

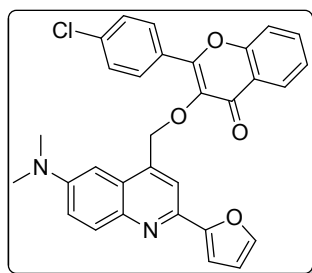

Yield: 87% as black-brown liquid;  $^1\text{H}$  NMR (400 MHz,  $\text{CDCl}_3$ , ppm):  $\delta$  8.21 (d,  $J = 10$  Hz, 1H), 8.09 (d,  $J = 10.5$  Hz, 1H), 7.69-7.67 (m, 2H), 7.53 (d,  $J = 10.5$  Hz, 1H), 7.45 (d,  $J = 10$  Hz, 1H), 7.41-7.37 (m, 1H), 7.26-7.25 (m, 3H), 7.08-7.05 (m, 2H), 6.93 (dd,  $J = 1, 11$  Hz, 2H), 6.58 (s, 1H), 4.94 (s, 2H), 3.01 (s, 6H).  $^{13}\text{C}$  NMR (100 MHz,  $\text{CDCl}_3$ , ppm):  $\delta$  175.3, 160.9, 156.2, 155.3, 152.9, 150.8, 148.5, 143.2, 138.7, 137.2, 134.1, 132.1, 130.4, 129.2, 128.9, 128.8, 128.2, 125.8, 125.3, 125.2, 123.7, 121.8, 120.8, 118.1, 117.4, 112.8, 76.7, 41.8. FTIR (KBr,  $\nu = \text{cm}^{-1}$ ): 3092, 3075, 2953, 2917, 1701, 1695, 1628, 1592,

1513, 1465, 1410,1348, 1321, 1247, 1174, 1042. HRMS (ESI+):  $m/z$  calcd. for  $C_{31}H_{23}ClN_2NaO_4$   $[M+Na]^+$ : 545.1238, found: 545.1229.

#### 7-((6-chloro-2-(4-nitrophenyl)quinolin-4-yl)methoxy)-4-methyl-2H-chromen-2-one (5a)

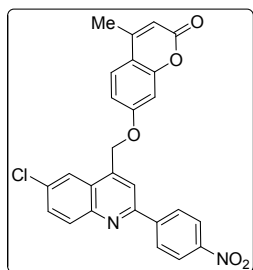

Yield: 94% as brown liquid;  $^1H$  NMR (400 MHz,  $CDCl_3$ , ppm):  $\delta$  8.38 (d,  $J = 11$  Hz, 3H), 8.07 (d,  $J = 10.5$  Hz, 3H), 7.52 (d,  $J = 11.5$  Hz, 1H), 7.30 (d,  $J = 3$  Hz, 1H), 7.12 (dd,  $J = 3, 11$  Hz, 2H), 6.92 (d,  $J = 4$  Hz, 1H), 6.16 (s, 1H), 4.75 (s, 2H), 2.40 (s, 3H).  $^{13}C$  NMR (100 MHz,  $CDCl_3$ , ppm):  $\delta$  163.4, 161.7, 160.5, 155.1, 153.0, 151.2, 150.5, 140.1, 136.1, 130.7, 128.8, 128.6, 125.8, 125.6, 124.4, 120.6, 117.3, 114.4, 113.0, 112.4, 102.2, 86.1, 72.4, 18.8. FTIR (KBr,  $\nu = cm^{-1}$ ): 3105, 3078, 2958, 2917, 1720, 1628, 1599, 1513, 1475, 1410, 1247, 1174, 1029. HRMS (ESI+):  $m/z$  calcd. for  $C_{26}H_{17}ClN_2NaO_5$   $[M+Na]^+$ : 495.0718, found: 495.0712.

#### 7-((6-chloro-2-(p-tolyl)quinolin-4-yl)methoxy)-4-methyl-2H-chromen-2-one (5b)

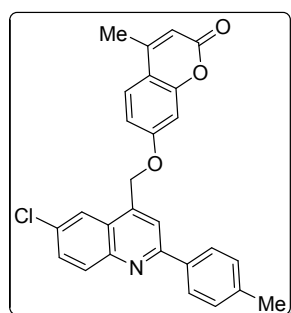

Yield: 91% as brown liquid;  $^1H$  NMR (400 MHz,  $CDCl_3$ , ppm):  $\delta$  7.78 (d,  $J = 10$  Hz, 2H), 7.53 (d,  $J = 7.53, J = 10.5$  Hz, 1H), 7.34-7.30 (m, 4H), 7.12 (dd,  $J = 10, 18$  Hz, 2H), 6.97-6.93 (m, 2H), 6.18 (s, 1H), 4.76 (s, 2H), 2.44 (s, 3H), 2.40 (s, 3H).  $^{13}C$  NMR (100 MHz,  $CDCl_3$ , ppm):  $\delta$  162.7, 161.6, 160.3, 154.7, 152.9, 150.4, 145.6, 135.8, 133.9, 129.8, 129.6, 128.6, 128.2, 125.5, 125.1, 120.5, 117.1, 114.1, 112.8, 112.0, 101.9, 86.6, 72.4, 21.7, 18.5. FTIR (KBr,  $\nu = cm^{-1}$ ): 3105, 3078, 2958, 2917, 1725, 1627, 1513, 1465, 1410, 1247, 1174, 1029. HRMS (ESI+):  $m/z$  calcd. for  $C_{27}H_{20}ClN_2NaO_3$   $[M+Na]^+$ : 464.1023, found: 464.1019.

### 7-((6-chloro-2-(4-methoxyphenyl)quinolin-4-yl)methoxy)-4-methyl-2H-chromen-2-one

(5c)

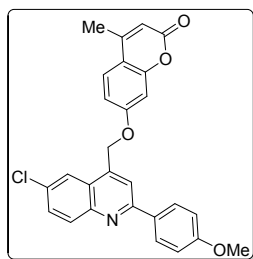

Yield: 89% as light yellow liquid;  $^1\text{H NMR}$  (400 MHz,  $\text{CDCl}_3$ , ppm):  $\delta$  7.85 (d,  $J = 11$  Hz, 2H), 7.54 (d,  $J = 11.5$  Hz, 1H), 7.32 (d,  $J = 3$  Hz, 1H), 7.14 (dd,  $J = 3, 10.5$  Hz, 2H), 7.01 (d,  $J = 11$  Hz, 2H), 6.97-6.94 (m, 3H), 6.19 (s, 1H), 4.84 (s, 2H), 3.90 (s, 3H), 2.41 (s, 3H).  $^{13}\text{C NMR}$  (100 MHz,  $\text{CDCl}_3$ , ppm):  $\delta$  164.9, 161.9, 160.6, 155.1, 153.1, 150.6, 134.4, 132.3, 129.9, 128.8, 128.5, 125.8, 125.5, 123.5, 120.7, 117.3, 114.5, 114.4, 113.1, 112.4, 102.2, 86.8, 76.7, 55.7, 18.8. FTIR (KBr,  $\nu = \text{cm}^{-1}$ ): 3105, 3078, 2958, 2917, 1723, 1629, 1592, 1513, 1465, 1410, 1245, 1173, 1024. HRMS (ESI<sup>+</sup>):  $m/z$  calcd. for  $\text{C}_{27}\text{H}_{20}\text{ClNNaO}_4$   $[\text{M}+\text{Na}]^+$ : 480.0973, found: 480.0965.

### 7-((6-chloro-2-(3,4,5-trimethoxyphenyl)quinolin-4-yl)methoxy)-4-methyl-2H-chromen-2-one (5d)

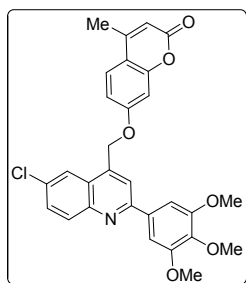

Yield: 85% as brown liquid;  $^1\text{H NMR}$  (400 MHz,  $\text{CDCl}_3$ , ppm):  $\delta$  8.02 (d,  $J = 10.5$  Hz, 1H), 7.79 (d,  $J = 3$  Hz, 1H), 7.63 (s, 3H), 7.60 (dd,  $J = 3, 11$  Hz, 1H), 7.45-7.41 (m, 3H), 6.65 (s, 1H), 5.26 (s, 2H), 3.80 (s, 9H), 2.4 (s, 3H).  $^{13}\text{C NMR}$  (100 MHz,  $\text{CDCl}_3$ , ppm):  $\delta$  162.5, 161.5, 160.5, 155.0, 153.7, 152.9, 150.7, 143.6, 137.9, 131.7, 128.9, 128.2, 125.7, 125.2, 120.7, 117.3, 114.3, 112.9, 112.3, 106.8, 102.2, 86.3, 76.6, 61.0, 56.3, 18.7. FTIR (KBr,  $\nu = \text{cm}^{-1}$ ): 3105, 3078, 2958, 2917, 1726, 1627, 1593, 1513, 1468, 1410, 1247, 1174, 1029. HRMS (ESI<sup>+</sup>):  $m/z$  calcd. for  $\text{C}_{29}\text{H}_{24}\text{ClNNaO}_6$   $[\text{M}+\text{Na}]^+$ : 540.1184, found: 540.1186.

### 7-((6-chloro-2-(4-chlorophenyl)quinolin-4-yl)methoxy)-4-methyl-2H-chromen-2-one (5e)

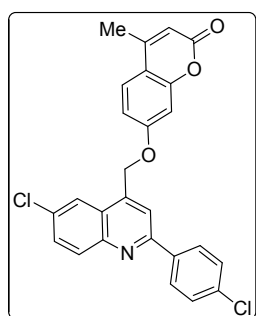

Yield: 86% as brown liquid;  $^1\text{H NMR}$  (400 MHz,  $\text{CDCl}_3$ , ppm):  $\delta$  8.33-8.32 (m, 3H), 8.01-7.99 (m, 4H), 7.62-7.59 (m, 1H), 7.46-7.43 (m, 3H), 6.66 (s, 1H), 5.26 (s, 2H), 2.42 (s, 3H).  $^{13}\text{C NMR}$  (100 MHz,

CDCl<sub>3</sub>, ppm):  $\delta$  162.5, 161.5, 160.5, 155.0, 152.8, 150.7, 141.1, 137.7, 134.7, 131.0, 129.5, 128.9, 128.3, 125.8, 125.3, 120.7, 117.3, 114.3, 112.9, 112.4, 102.2, 86.5, 76.6, 18.7. FTIR (KBr,  $\nu = \text{cm}^{-1}$ ): 3102, 3078, 2958, 2917, 1722, 1629, 1595, 1513, 1465, 1410, 1247, 1174, 1029. HRMS (ESI<sup>+</sup>):  $m/z$  calcd. for C<sub>26</sub>H<sub>17</sub>Cl<sub>2</sub>NNaO<sub>3</sub> [M+Na]<sup>+</sup>: 484.0477, found: 484.0469.

#### 7-((6-chloro-2-(furan-2-yl)quinolin-4-yl)methoxy)-4-methyl-2H-chromen-2-one (5f)

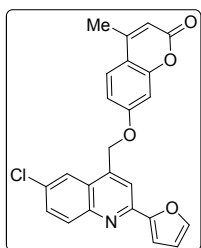

Yield: 88% as brown liquid; <sup>1</sup>H NMR (400 MHz, CDCl<sub>3</sub>, ppm):  $\delta$  7.75 (t,  $J = 1\text{ Hz}$ , 1H), 7.58 (dd,  $J = 3, 9\text{ Hz}$ , 1H), 7.35 (d,  $J = 3\text{ Hz}$ , 2H), 7.31 (dd,  $J = 0.5, 3\text{ Hz}$ , 1H), 7.16 (dd,  $J = 3.5, 11\text{ Hz}$ , 2H), 7.01-6.97 (m, 2H), 6.66-6.65 (m, 1H), 6.21 (s, 1H), 4.85 (s, 2H), 2.44 (s, 3H). <sup>13</sup>C NMR (100 MHz,

CDCl<sub>3</sub>, ppm):  $\delta$  162.9, 161.6, 160.5, 155.0, 153.0, 152.9, 150.7, 148.3, 136.1, 128.9, 128.4, 125.8, 125.3, 121.5, 120.7, 117.4, 114.3, 112.9, 112.8, 112.4, 102.2, 86.3, 76.6, 18.8. FTIR (KBr,  $\nu = \text{cm}^{-1}$ ): 3107, 3075, 2953, 2915, 1725, 1630, 1595, 1513, 1465, 1410, 1247, 1174, 1024. HRMS (ESI<sup>+</sup>):  $m/z$  calcd. for C<sub>24</sub>H<sub>16</sub>ClNNaO<sub>4</sub> [M+Na]<sup>+</sup>: 440.0660, found: 440.0664.

#### 7-((6-chloro-2-(1H-indol-3-yl)quinolin-4-yl)methoxy)-4-methyl-2H-chromen-2-one (5g)

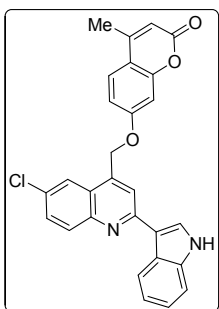

Yield: 85% as brown liquid; <sup>1</sup>H NMR (500 MHz, CDCl<sub>3</sub>, ppm):  $\delta$  8.17 (br, s, 1H, D<sub>2</sub>O exchangeable), 7.75 (d,  $J = 8\text{ Hz}$ , 1H), 7.42-7.37 (m, 3H), 7.29 (t,  $J = 7\text{ Hz}$ , 1H), 7.22 (t,  $J = 7\text{ Hz}$ , 1H), 7.18-7.16 (m, 3H), 6.99 (m, 2H), 6.63 (s, 1H), 6.20 (s, 1H), 4.74 (s, 2H), 2.35 (s, 3H). <sup>13</sup>C NMR (100 MHz, CDCl<sub>3</sub>, ppm):  $\delta$  162.6, 160.6, 160.2, 155.7, 154.1, 152.5, 144.8,

136.3, 132.5, 131.0, 130.7, 128.4, 125.6, 124.3, 123.2, 121.4, 121.2, 120.9, 119.6, 114.0, 112.3, 111.5, 110.8, 110.2, 102, 86.4, 76.6, 18.5. FTIR (KBr,  $\nu = \text{cm}^{-1}$ ): 3307, 3114, 3075, 2958, 2917, 1723, 1628, 1599, 1515, 1463, 1410, 1247, 1174, 1024. HRMS (ESI<sup>+</sup>):  $m/z$  calcd. for C<sub>28</sub>H<sub>19</sub>ClN<sub>2</sub>NaO<sub>3</sub> [M+Na]<sup>+</sup>: 489.0976, found: 489.0968.

**7-((6-chloro-2-(ferrocenyl)quinolin-4-yl)methoxy)-4-methyl-2H-chromen-2-one (5h)**

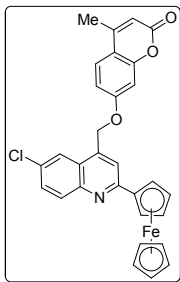

Yield: 80% as black liquid;  $^1\text{H}$  NMR (400 MHz,  $\text{CDCl}_3$ , ppm):  $\delta$  7.50 (d,  $J = 10.5$  Hz, 1H), 7.29 (s, 1H), 7.10 (d,  $J = 3.5$  Hz, 2H), 6.91 (d,  $J = 11$  Hz, 3H), 6.15 (s, 1H), 4.78 (s, 2H), 4.73 (s, 2H), 4.61 (s, 2H), 2.38 (s, 3H).  $^{13}\text{C}$  NMR (100 MHz,  $\text{CDCl}_3$ , ppm):  $\delta$  161.9, 160.5, 155.0, 153.2, 150.8, 147.6, 133.5, 128.9, 128.4, 125.8, 125.3, 120.8, 117.4, 114.3, 113.0, 112.3, 102.2, 86.5,

79.1, 76.7, 73.7, 69.9, 69.9, 18.8. FTIR (KBr,  $\nu = \text{cm}^{-1}$ ): 3102, 3077, 2952, 2915, 1720, 1629, 1594, 1515, 1465, 1412, 1247, 1174, 1029. HRMS (ESI $^+$ ):  $m/z$  calcd. for  $\text{C}_{30}\text{H}_{22}\text{ClFeNNaO}_3$   $[\text{M}+\text{Na}]^+$ : 558.0529, found: 558.0518.

# <sup>1</sup>H and <sup>13</sup>C Spectra

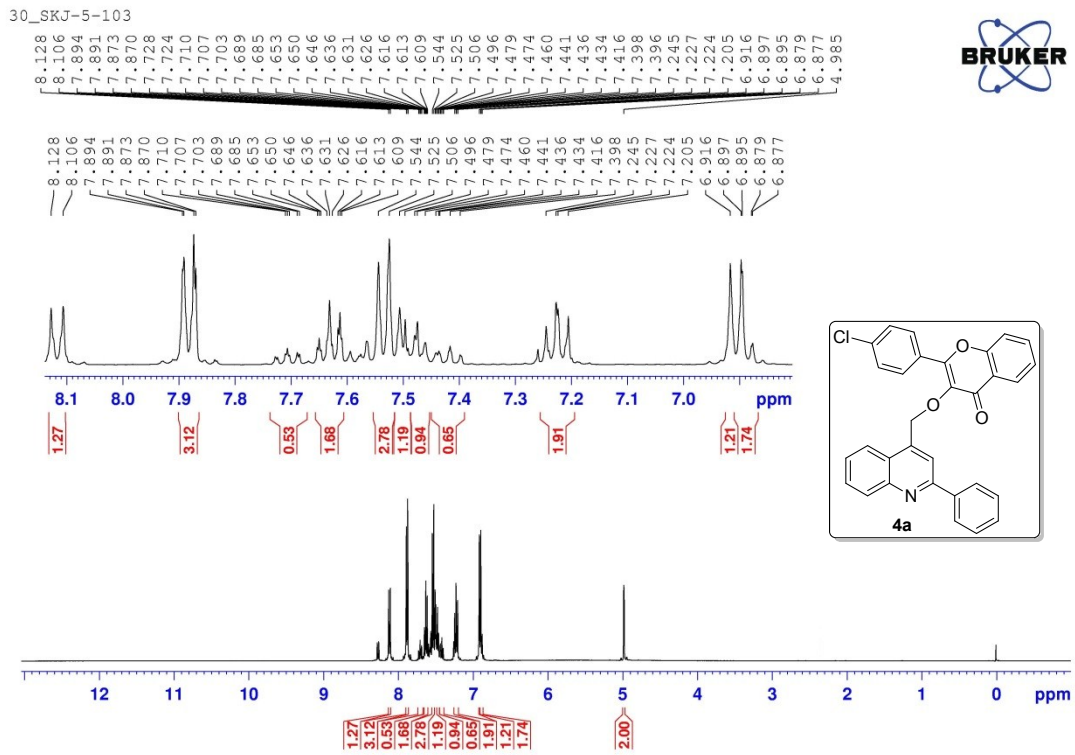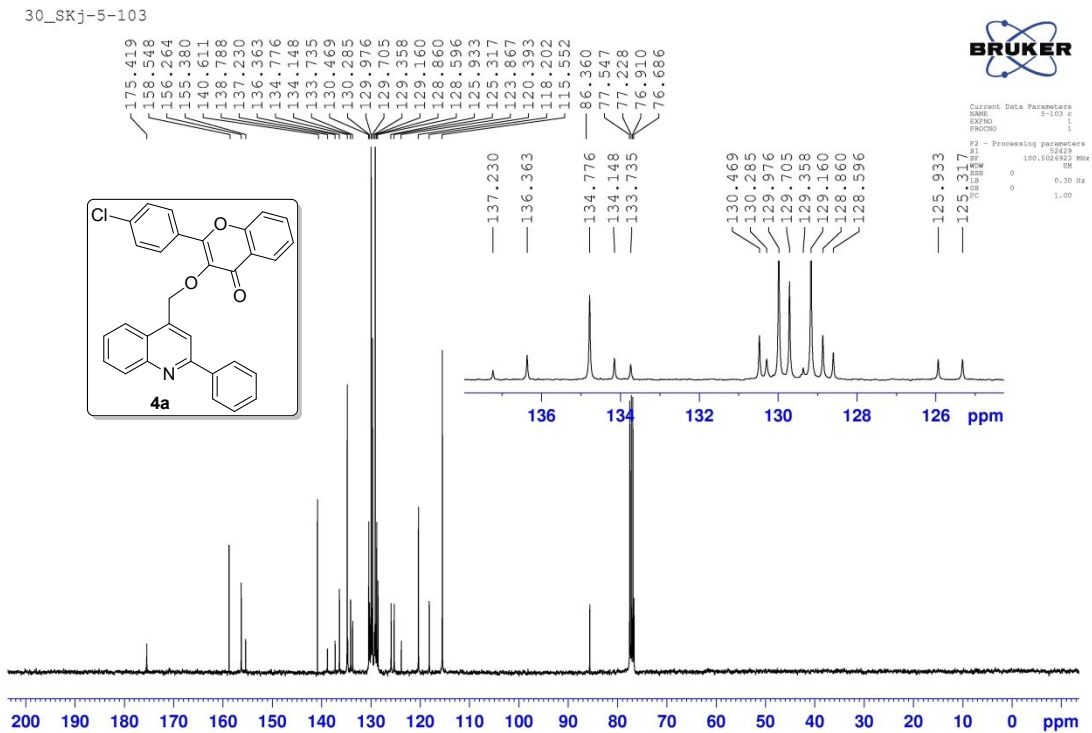

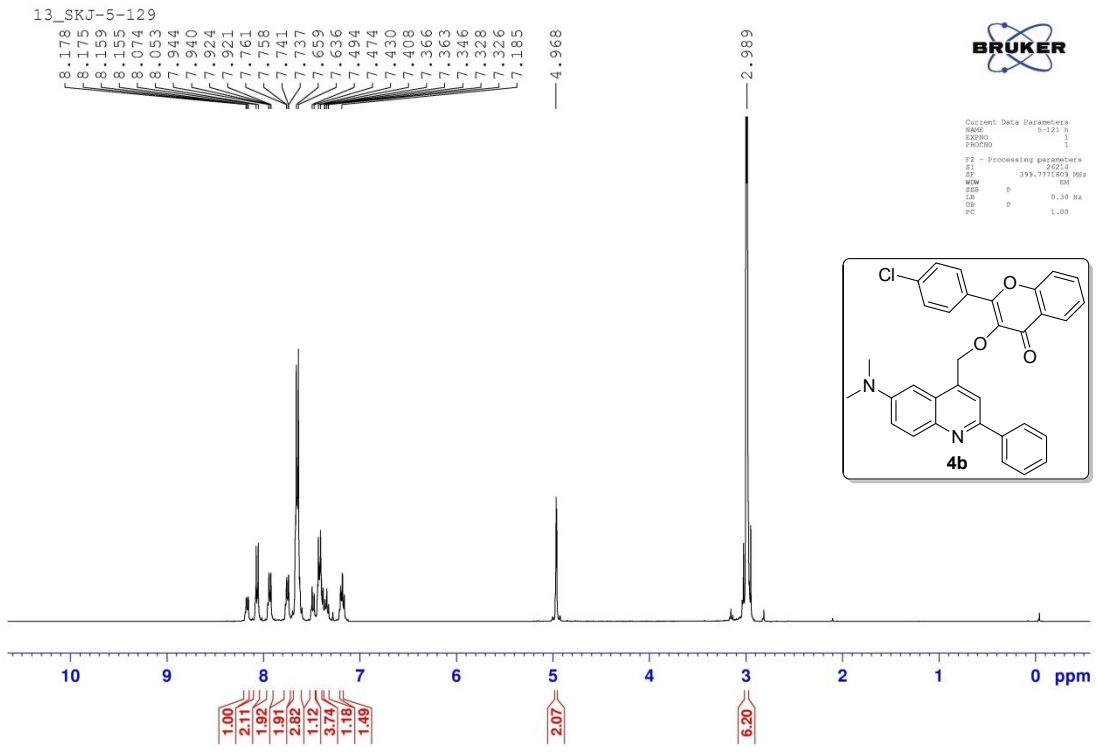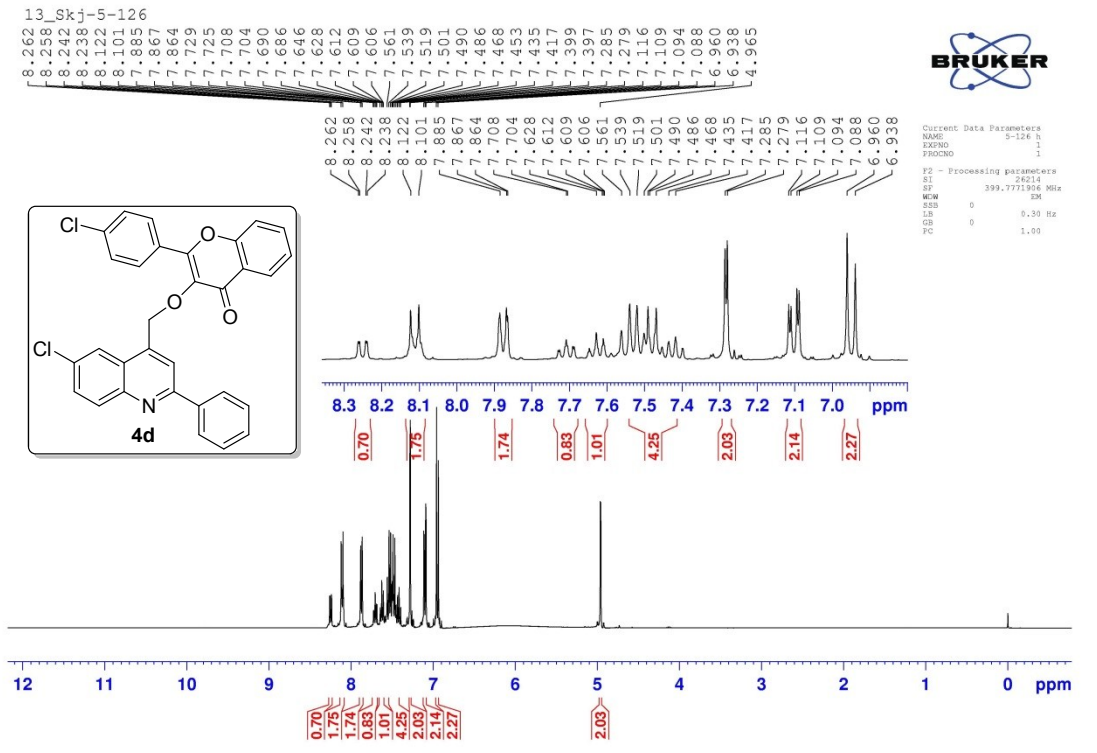

13\_skj-5-126

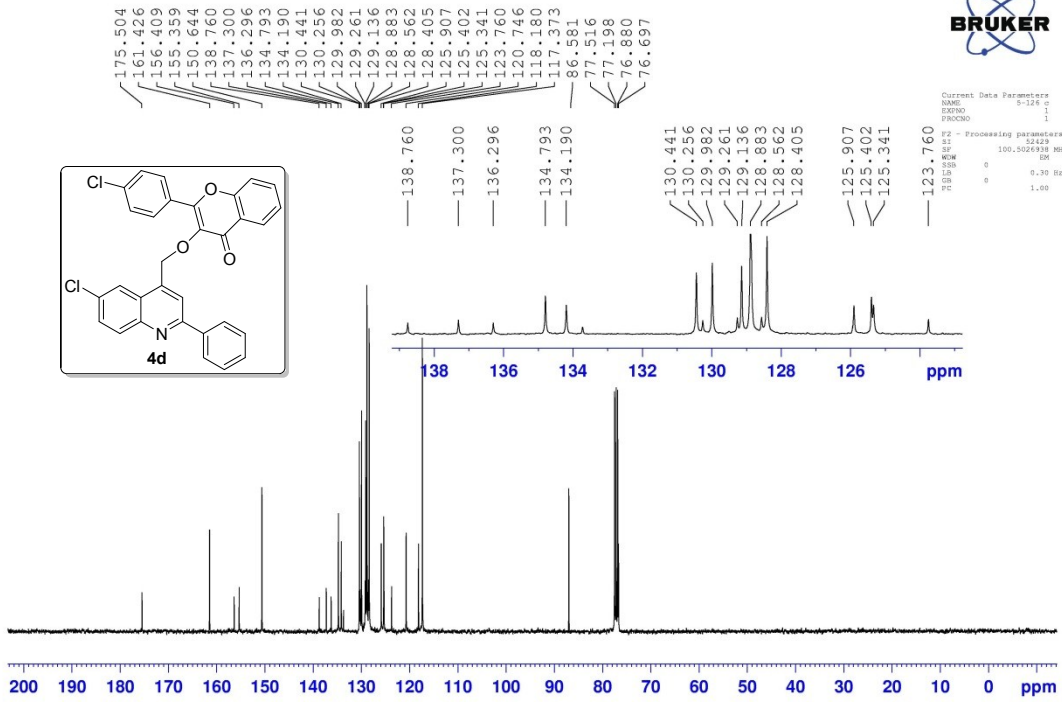

14\_SKJ-5-127

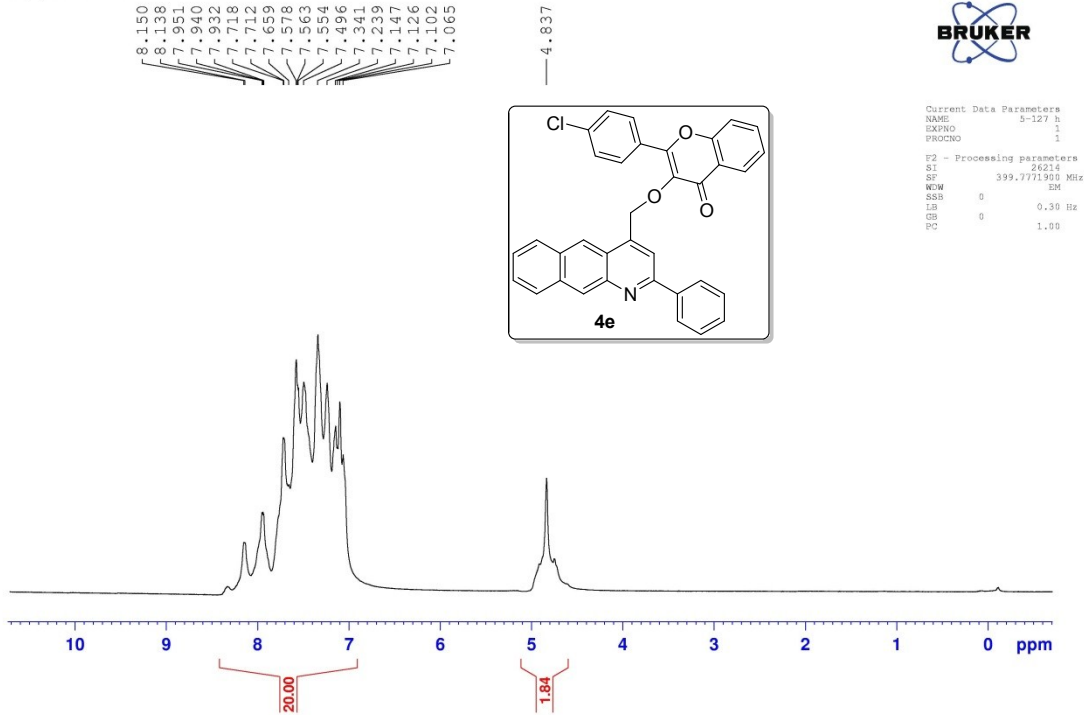



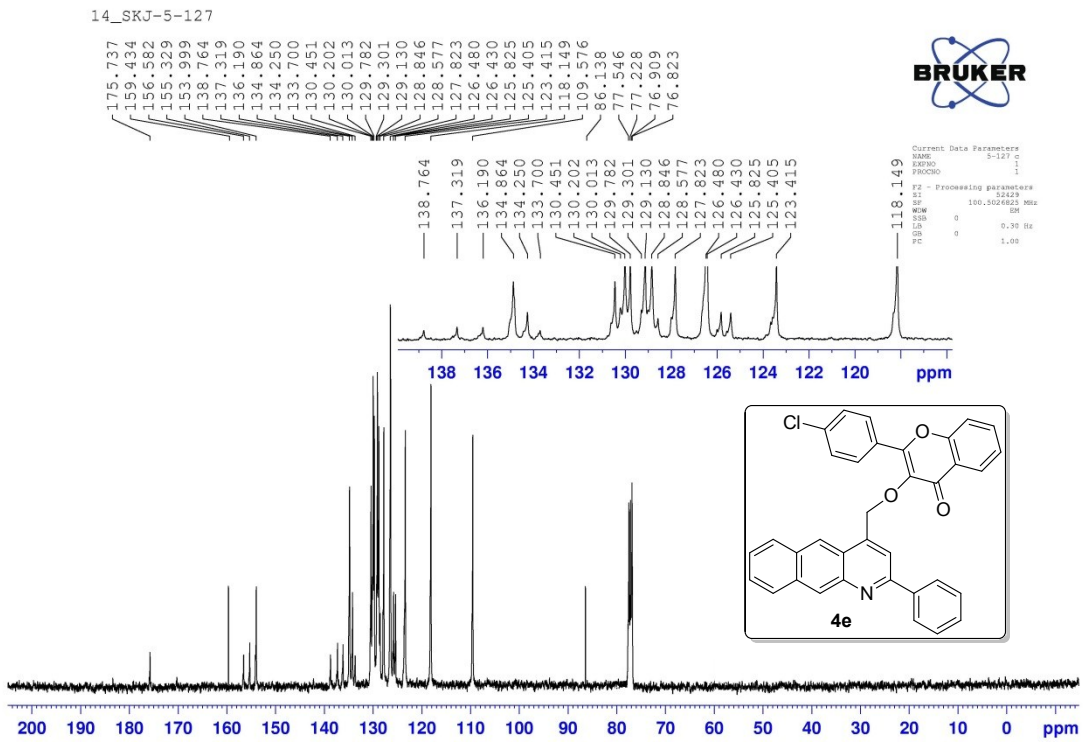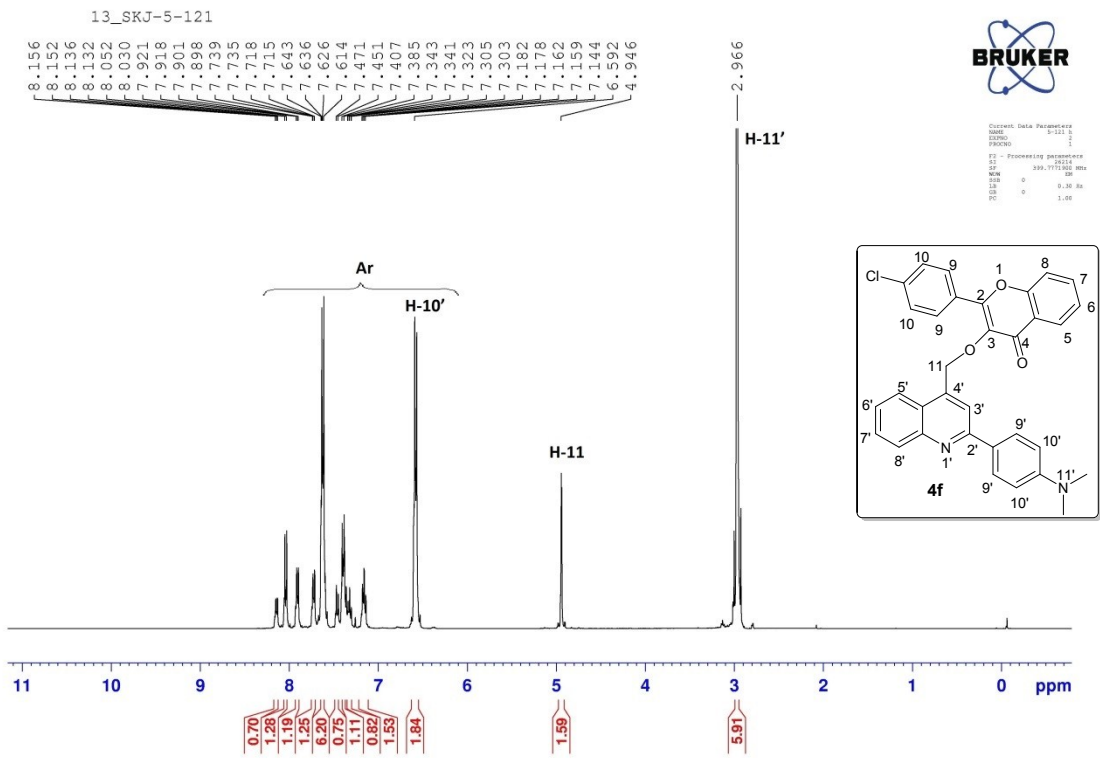

13\_SKJ-5-121

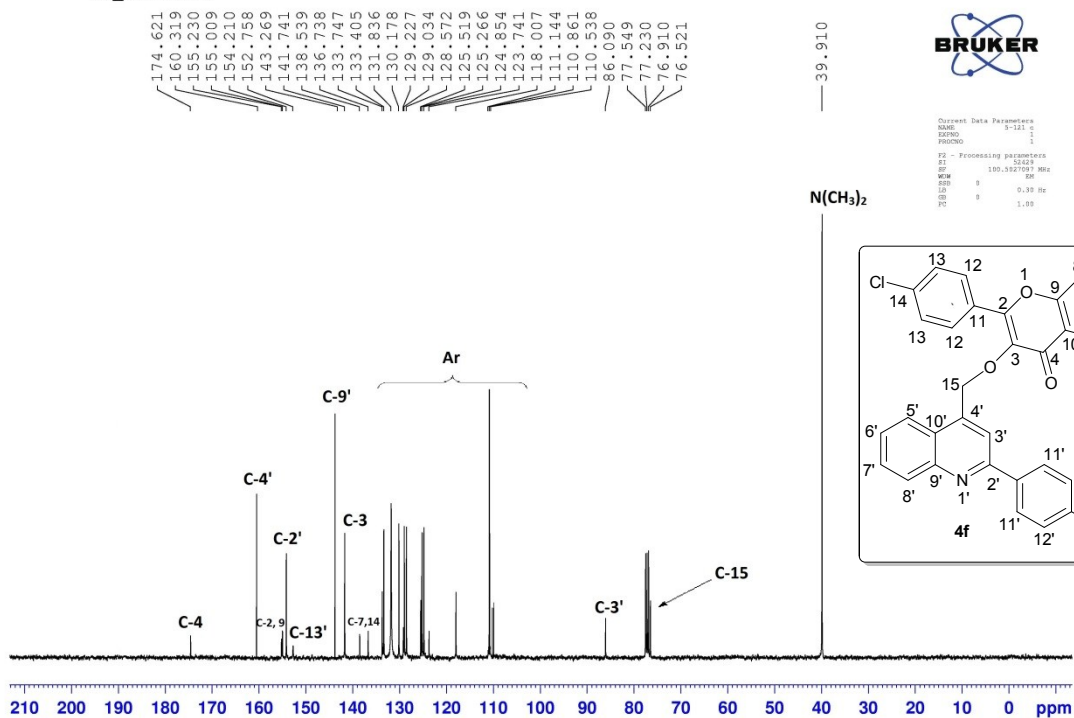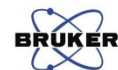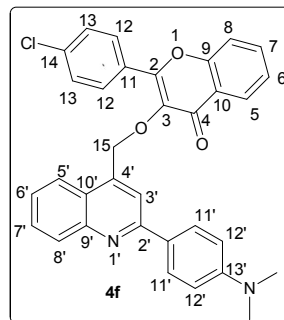

13\_SKJ-5-122

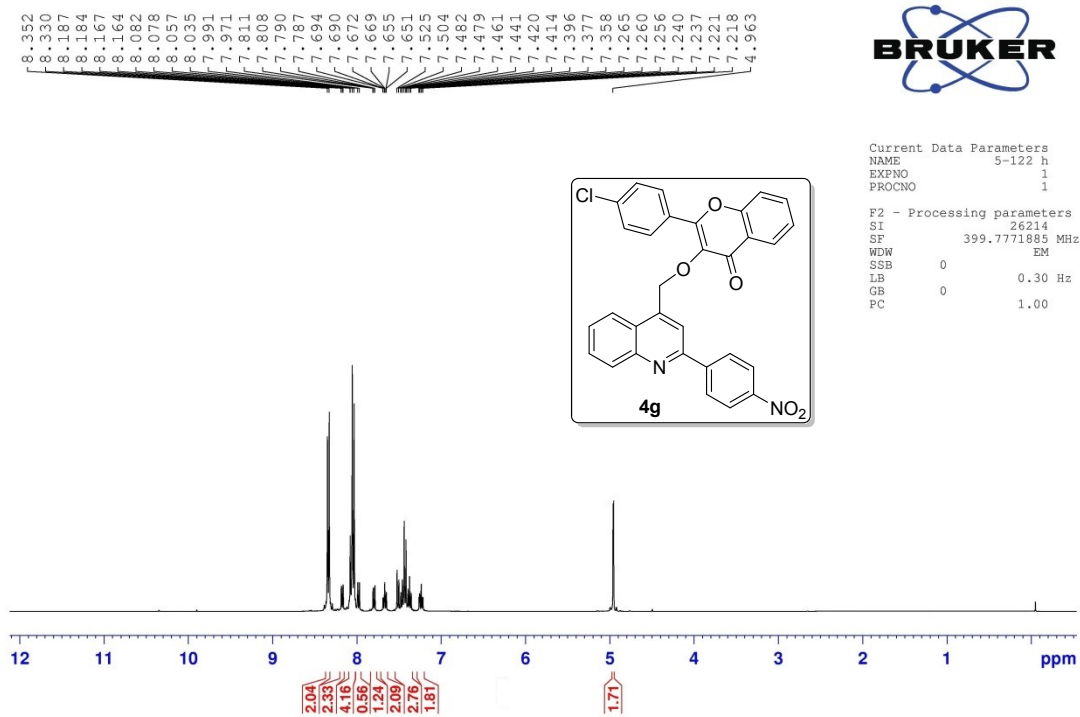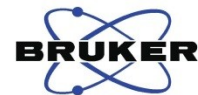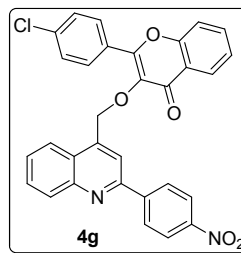

13\_SKJ-5-122

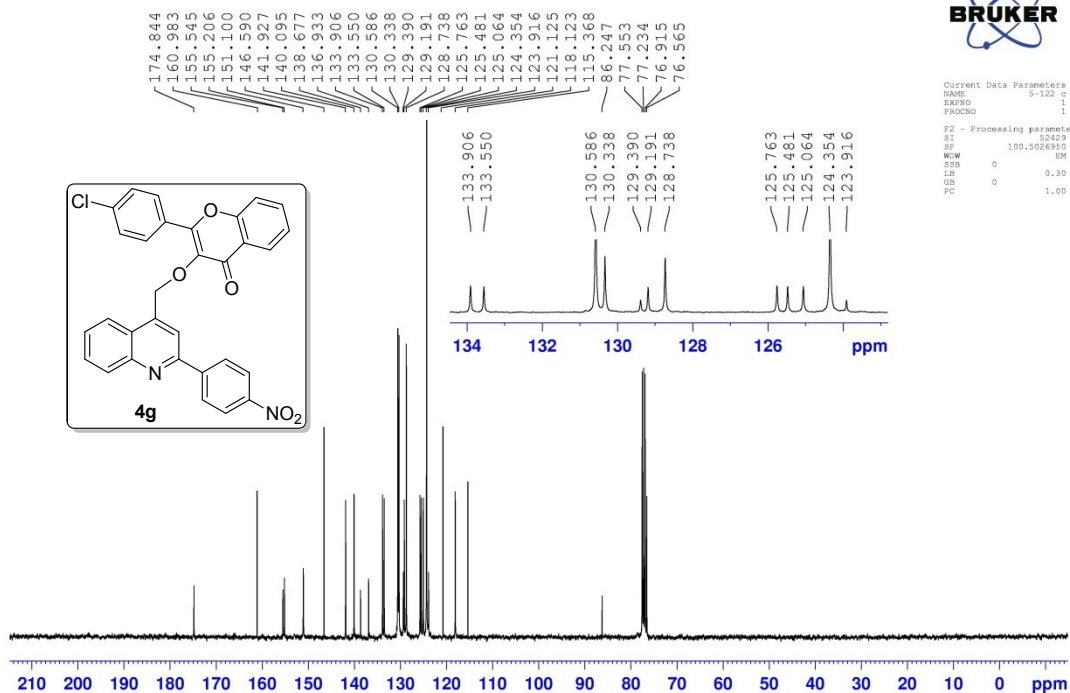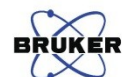

Current Data Parameters  
 NAME: 5-122.c  
 EXPNO: 1  
 PROCNO: 1  
 F2 - Processing parameters  
 SI: 32429  
 SF: 100.5026950 MHz  
 WVM: EM  
 SSB: 0  
 LB: 0.30 Hz  
 GB: 0  
 PC: 1.00

13\_SKJ-5-123

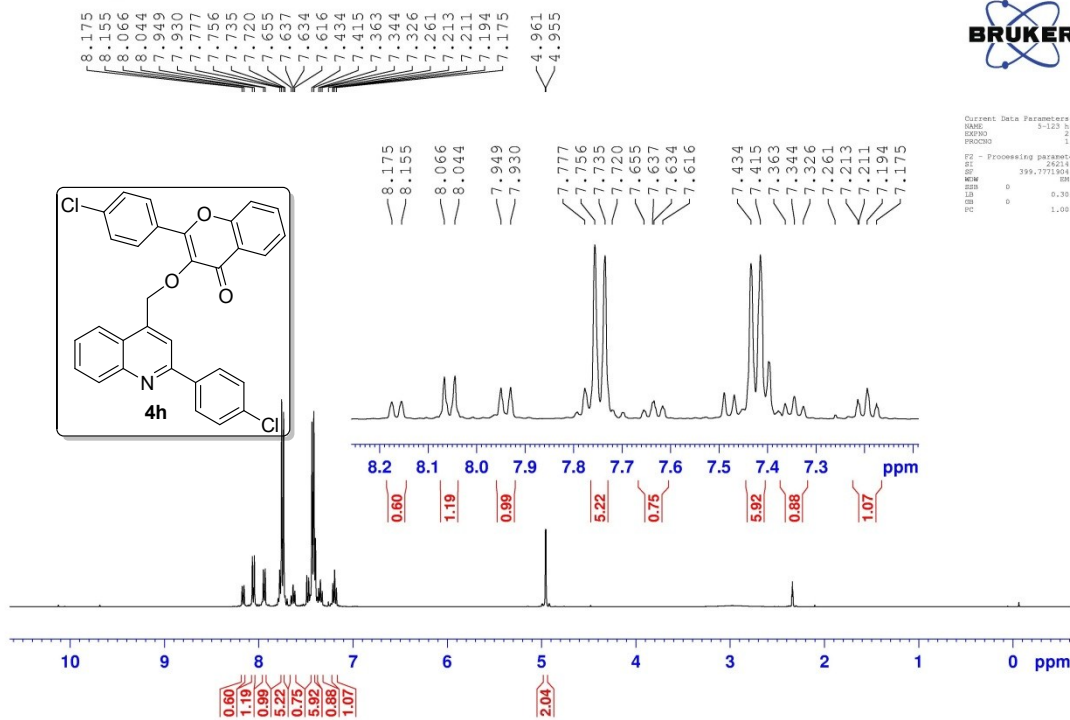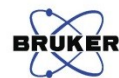

Current Data Parameters  
 NAME: 5-123.c  
 EXPNO: 2  
 PROCNO: 1  
 F2 - Processing parameters  
 SI: 24214  
 SF: 399.771504 MHz  
 WVM: EM  
 SSB: 0  
 LB: 0.30 Hz  
 GB: 0  
 PC: 1.00

13\_SKJ-5-123

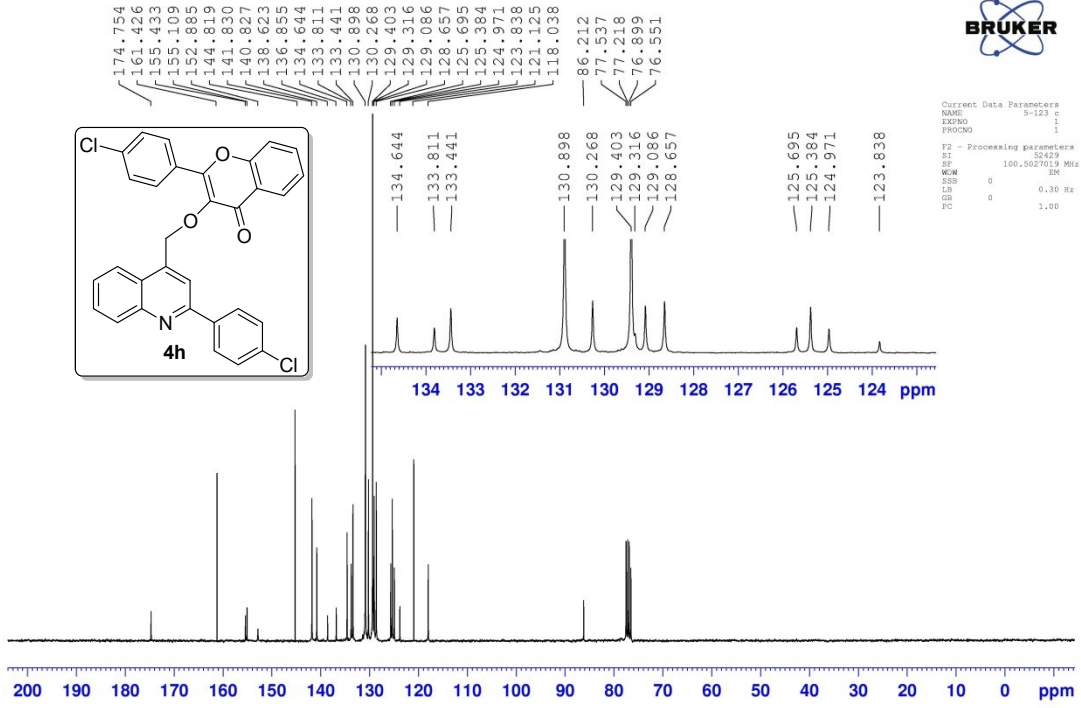

13\_SKJ-5-125

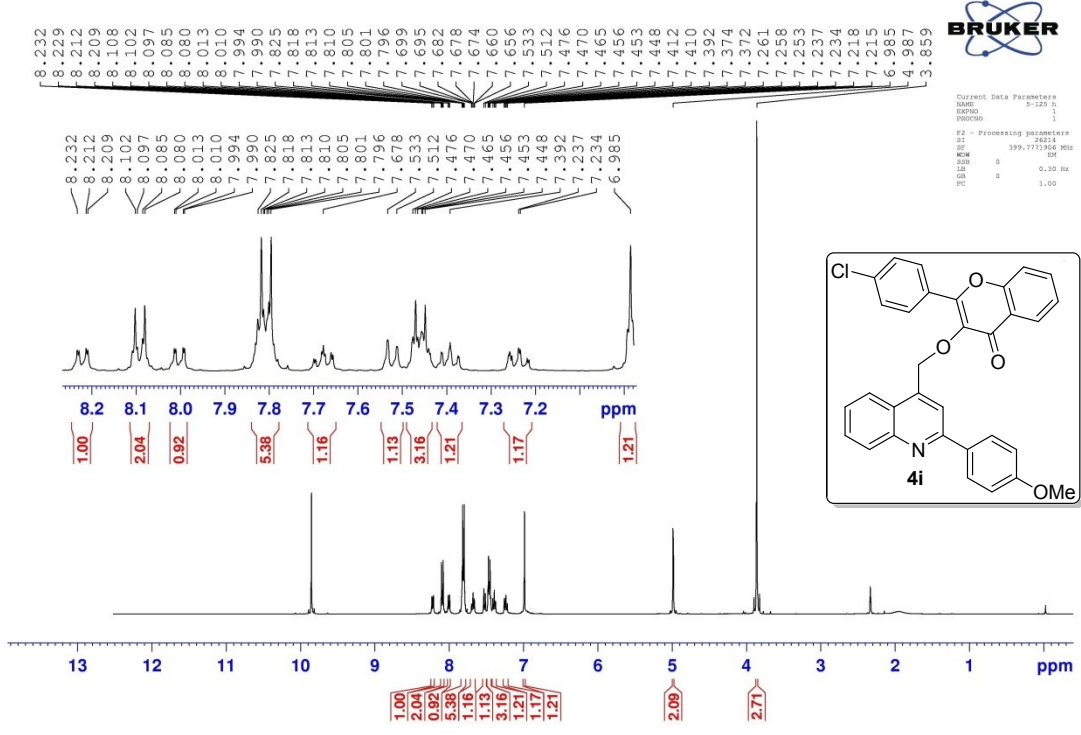

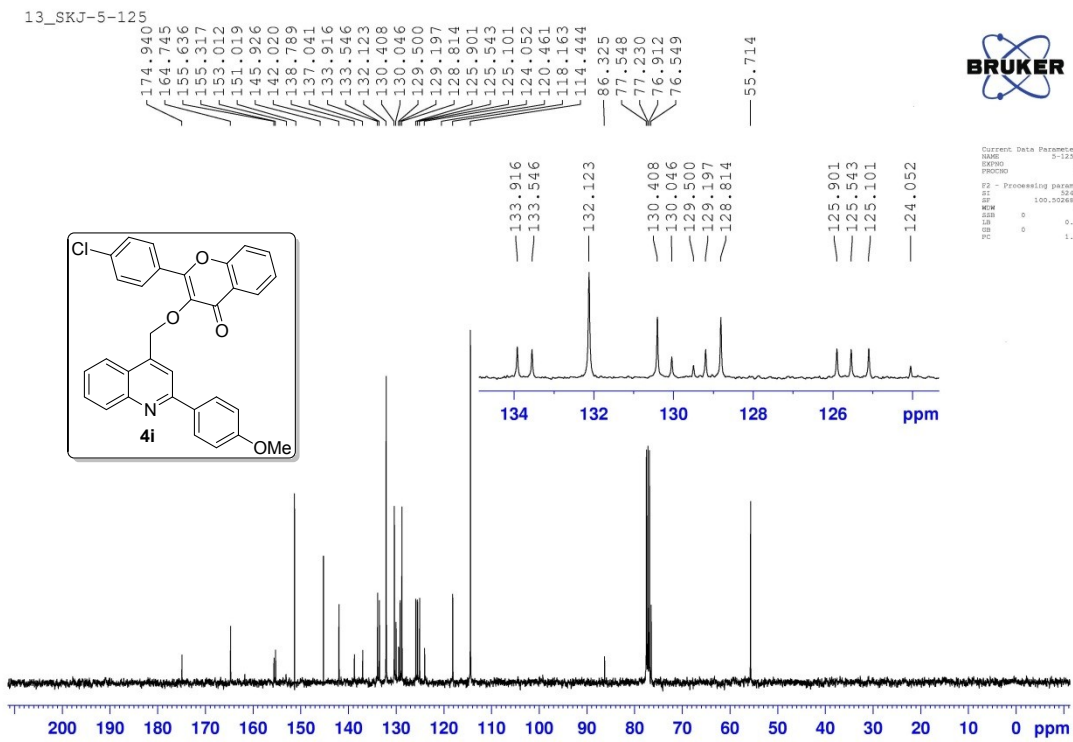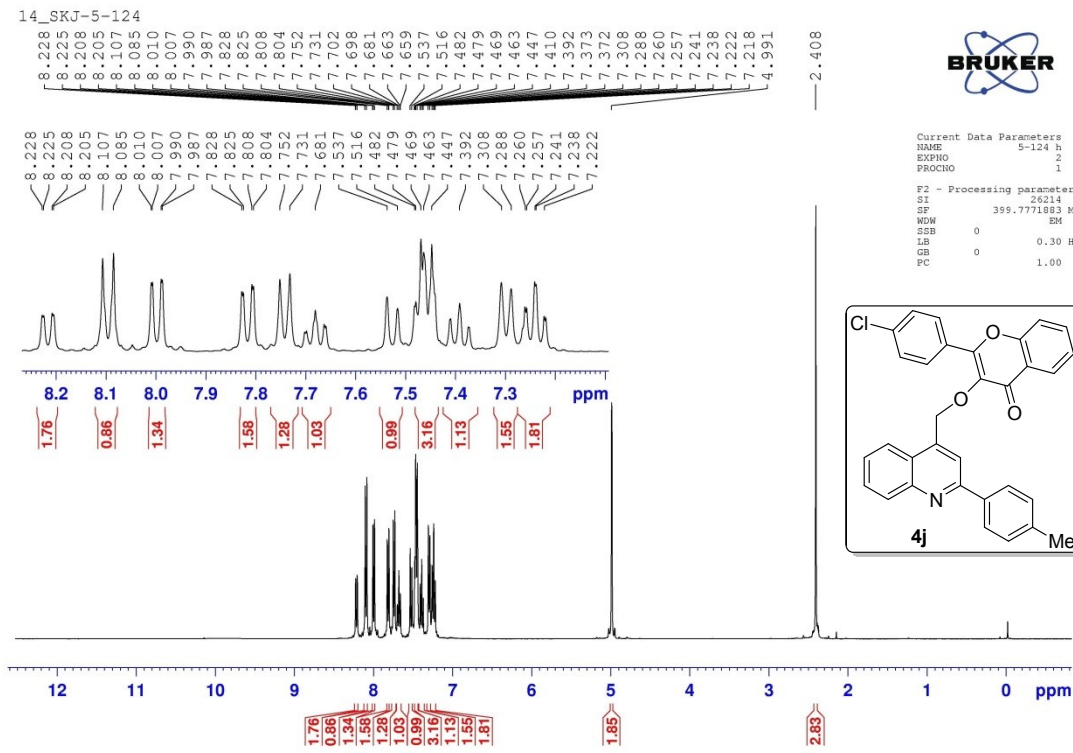

14\_SKJ-5-124

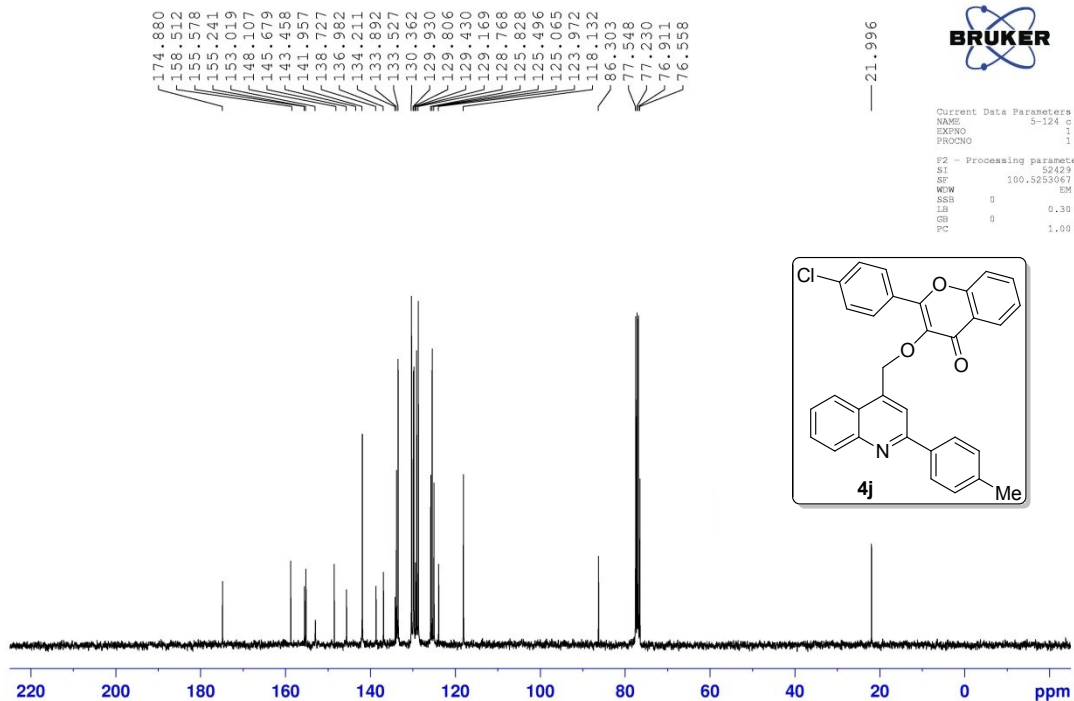

BRUKER

Current Data Parameters  
 NAME 5-124 c  
 EXPNO 1  
 PROCNO 1

F2 - Processing parameters  
 S1 52429  
 SF 100.625067 MHz  
 WDW EM  
 SSB 0  
 LB 0.30 Hz  
 GB 0  
 PC 1.00

skj-5-113

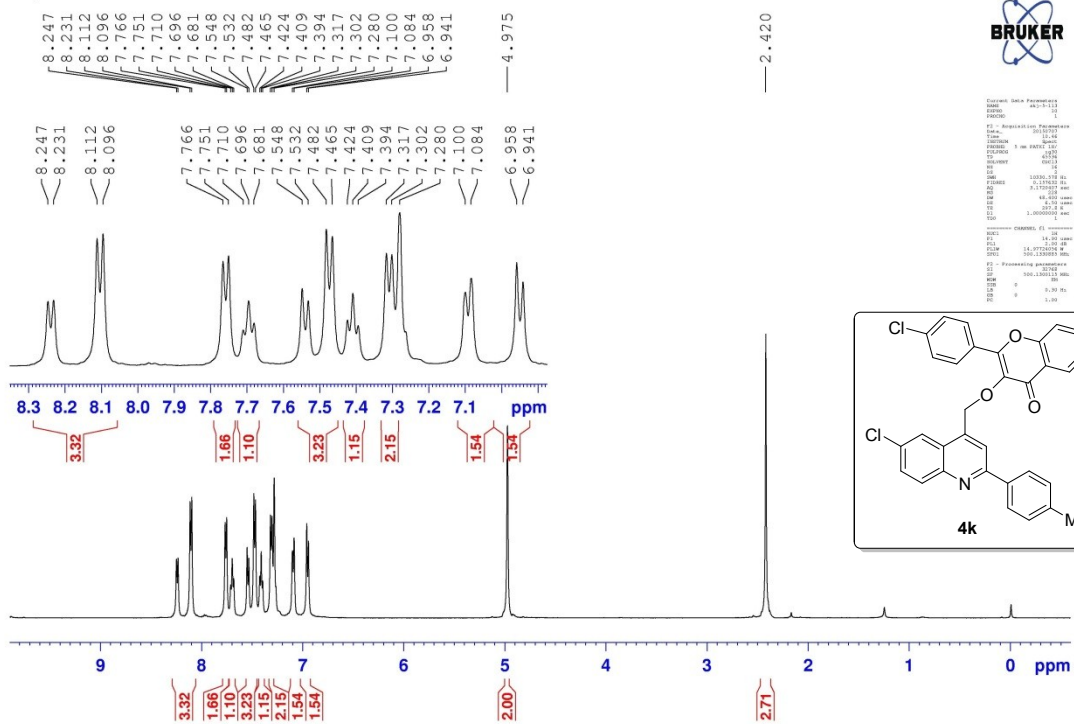

BRUKER

Current Data Parameters  
 NAME skj-5-113  
 EXPNO 1  
 PROCNO 1

F2 - Processing parameters  
 S1 52429  
 SF 100.625067 MHz  
 WDW EM  
 SSB 0  
 LB 0.30 Hz  
 GB 0  
 PC 1.00



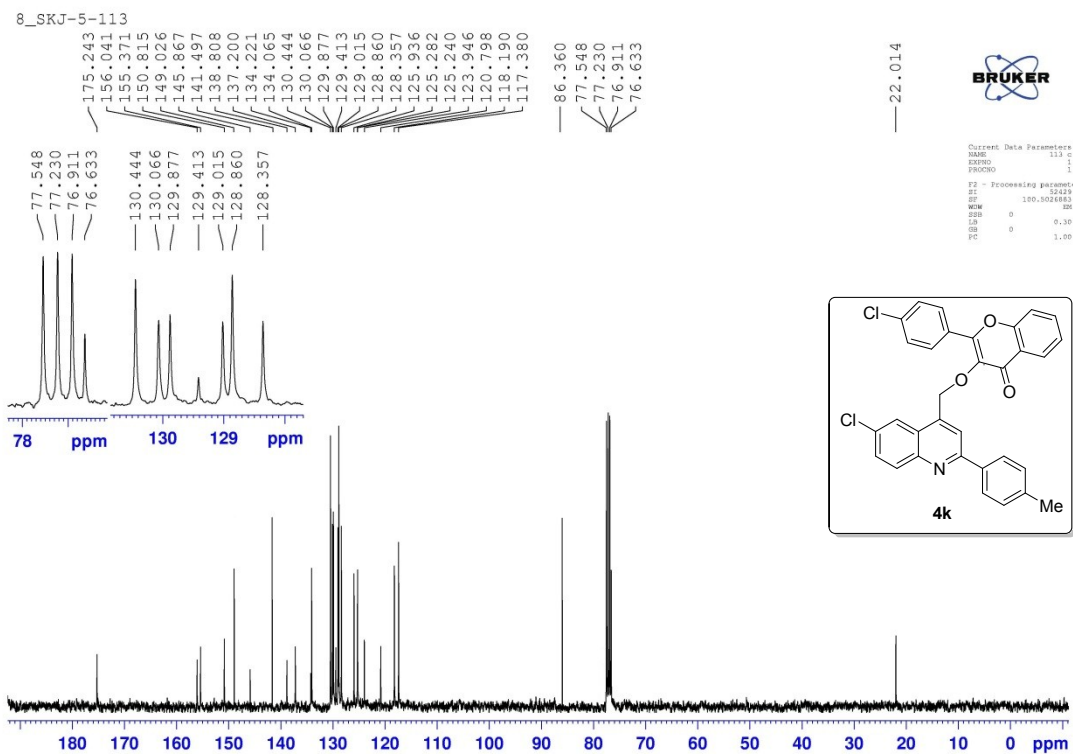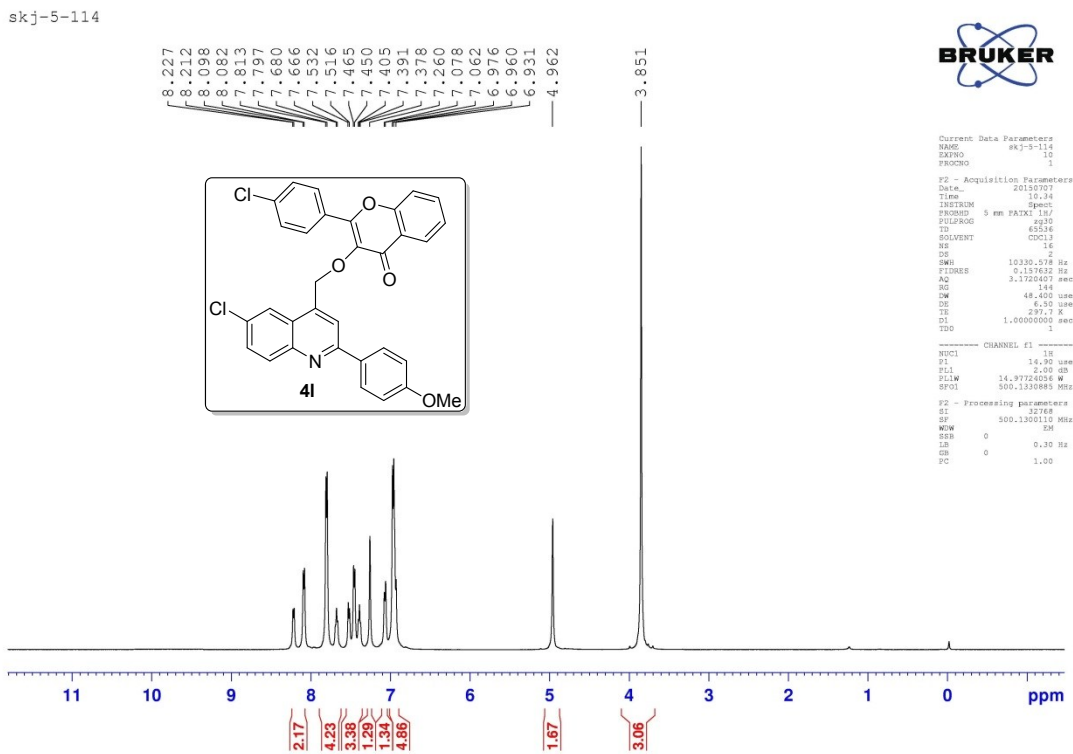

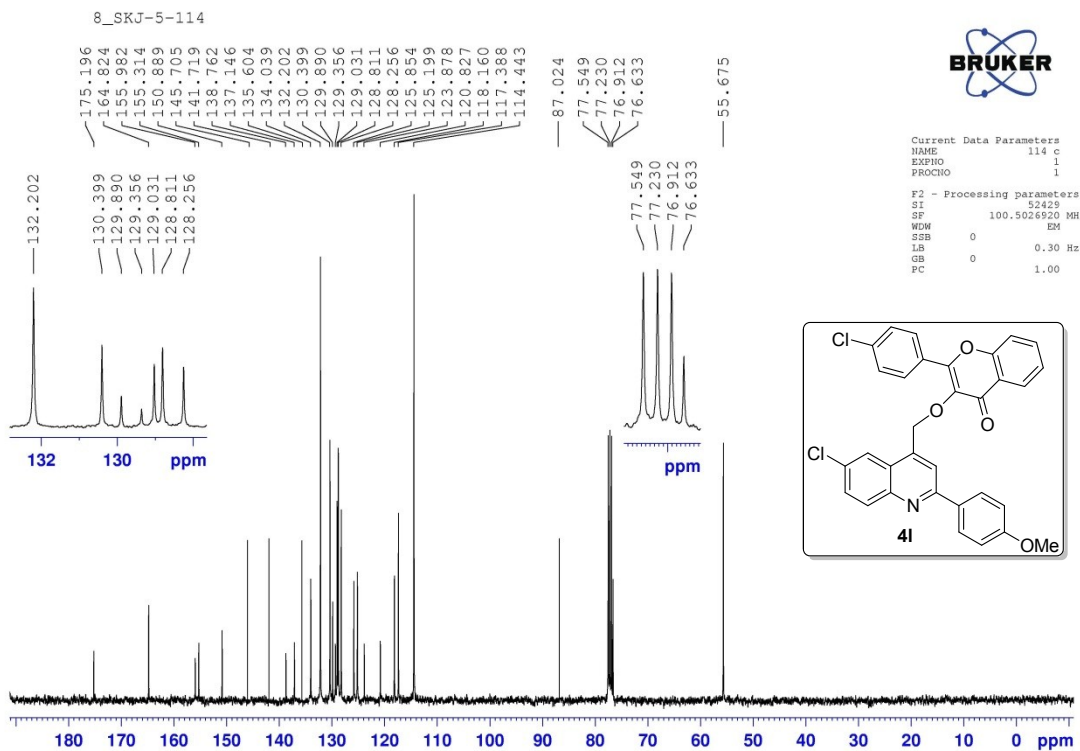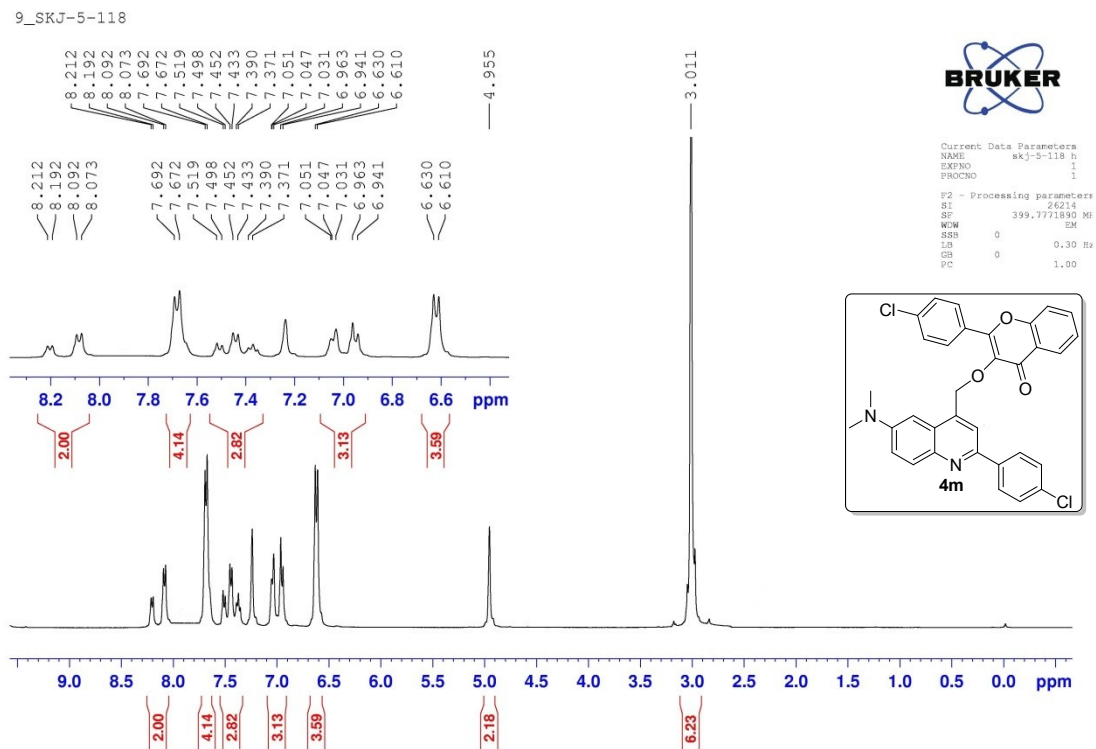



9\_SKJ-5-118

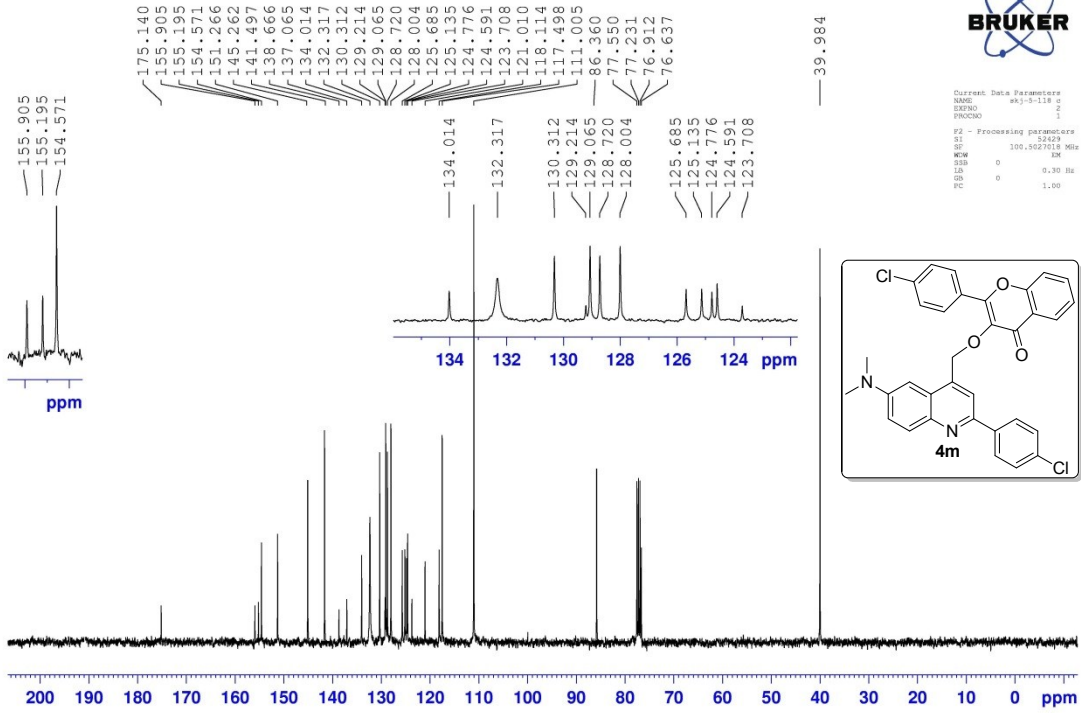

9\_SKJ-5-116

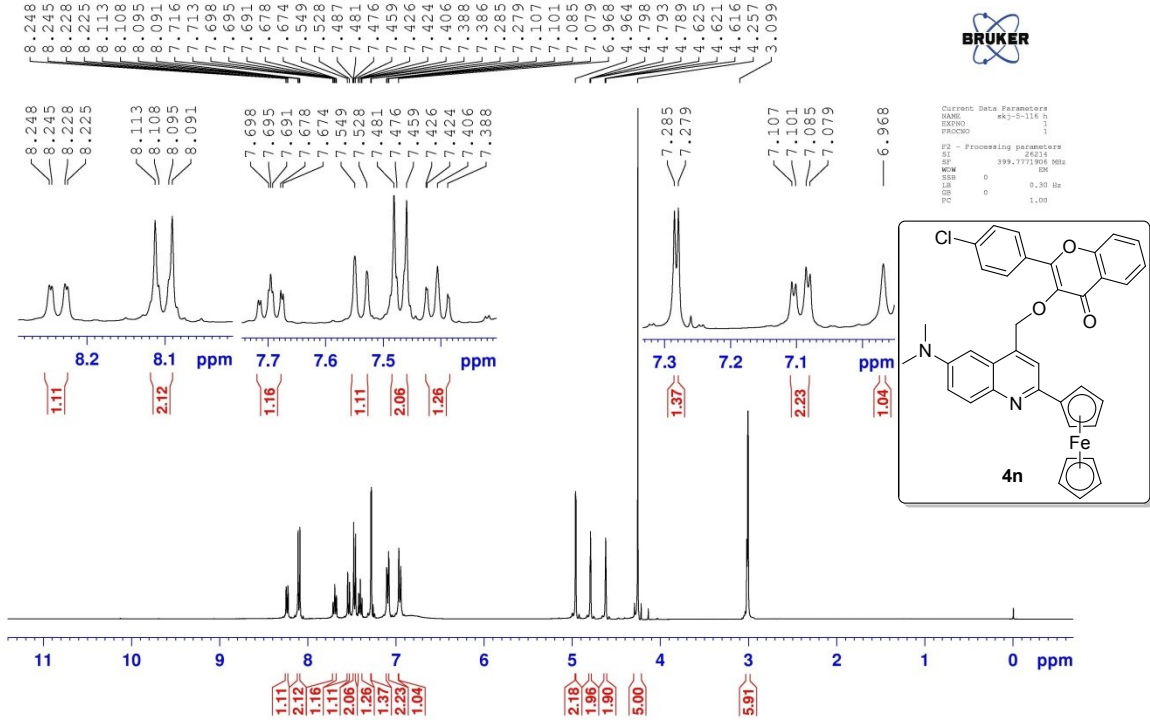

9\_SKJ-5-116

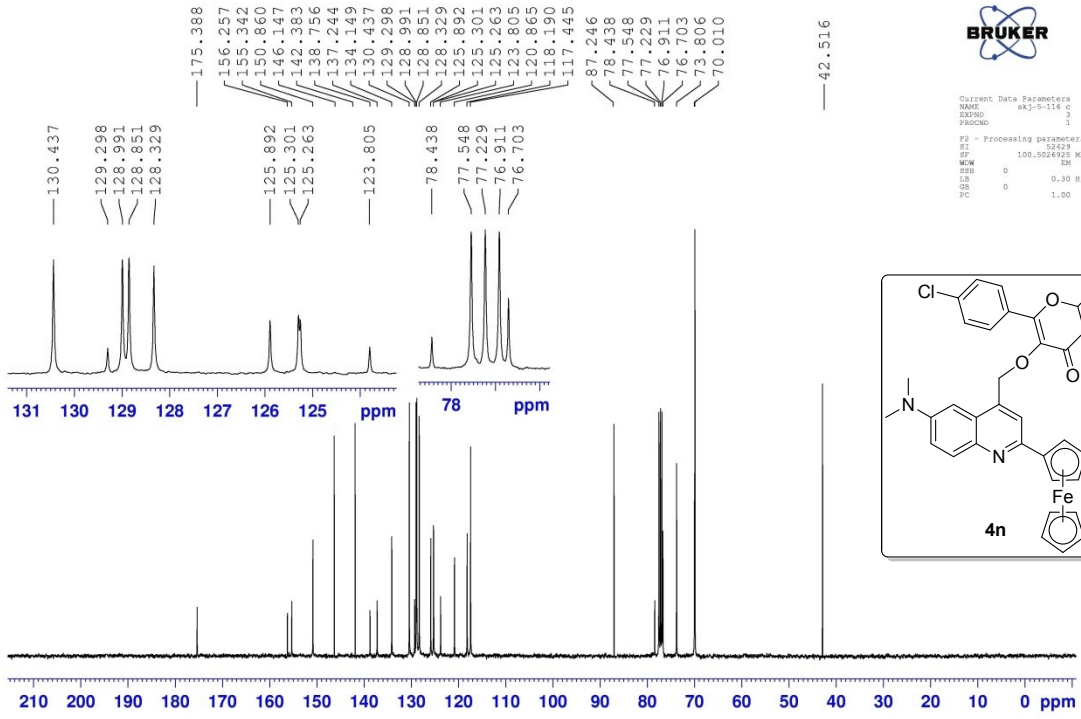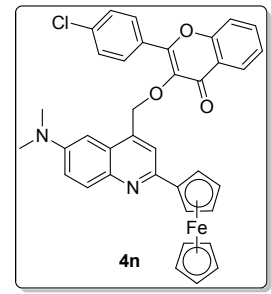

9\_SKJ-5-115

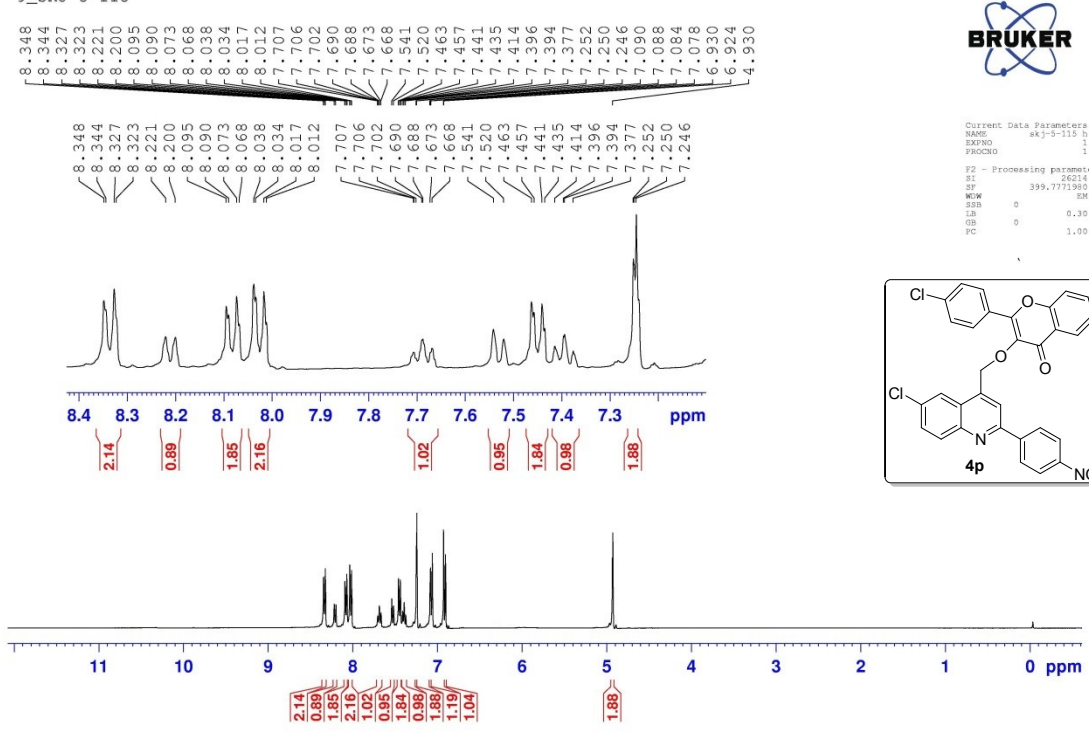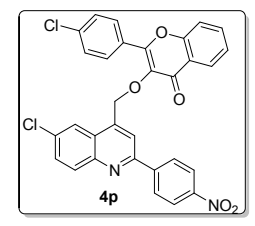

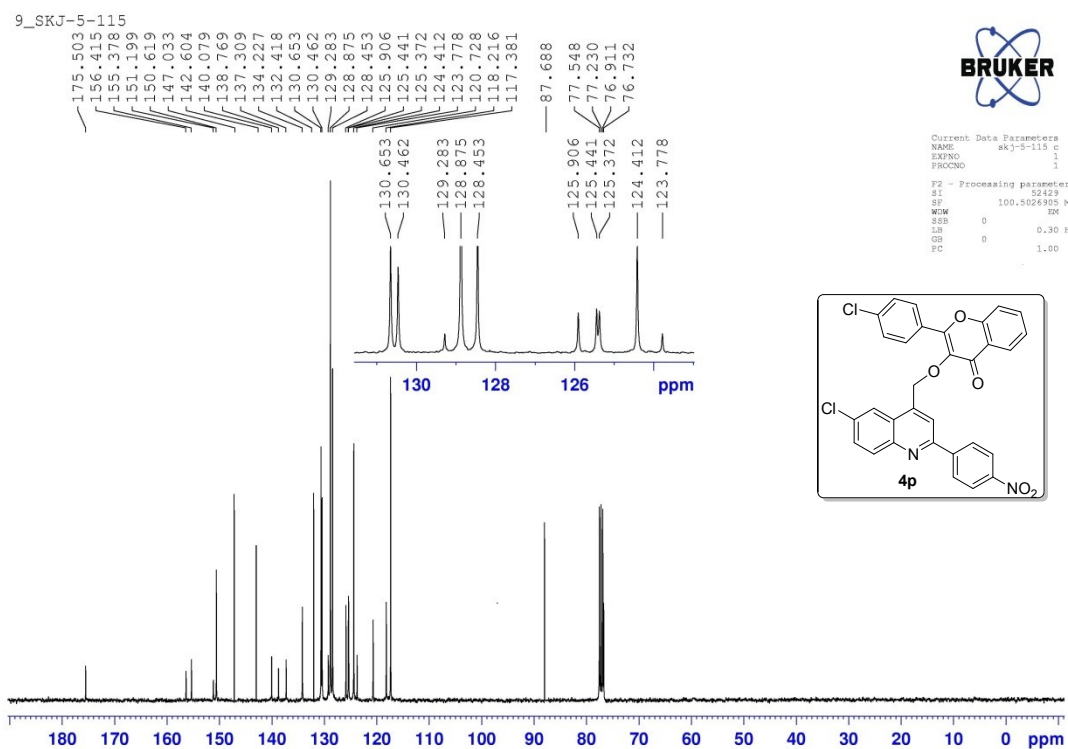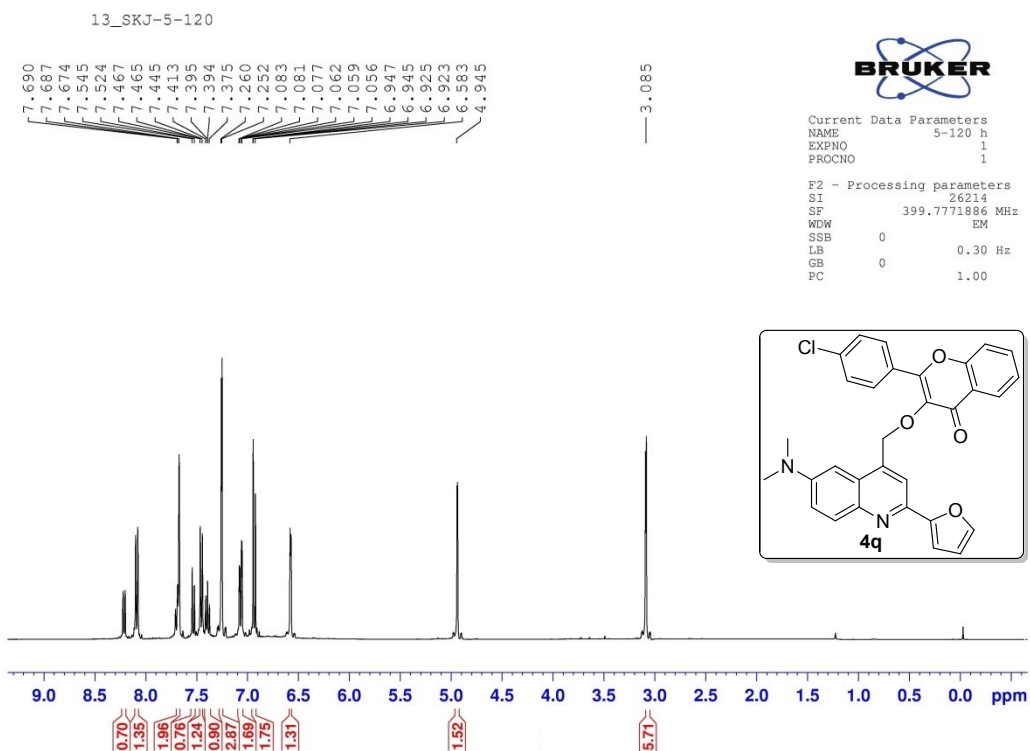

13\_SKJ-5-120

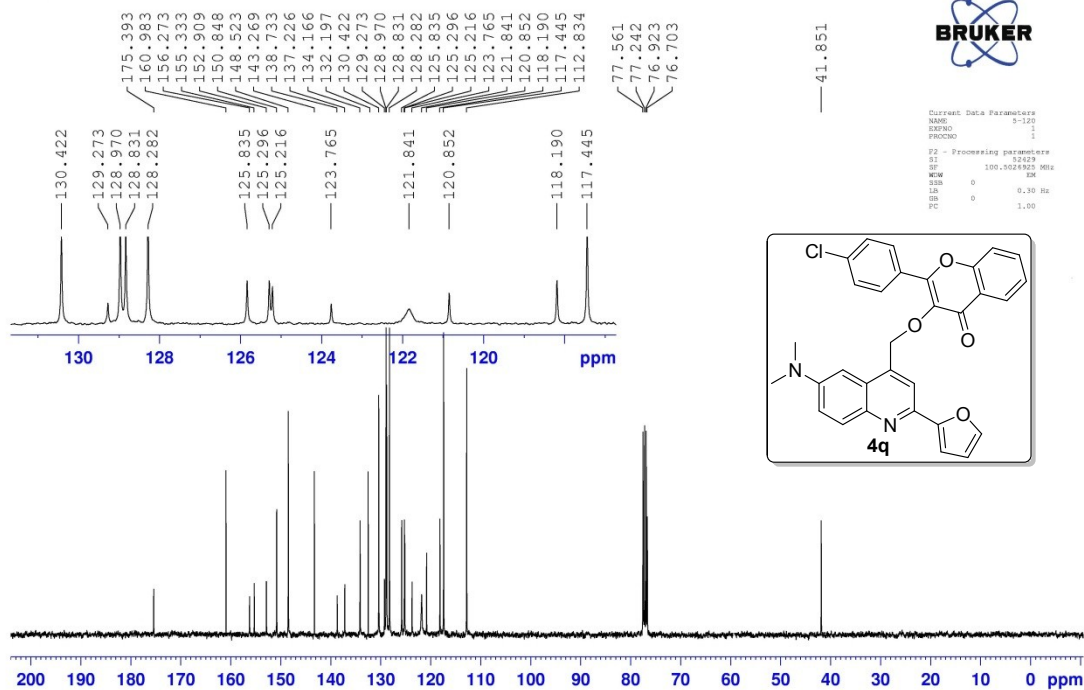

2\_SKJ-5-108

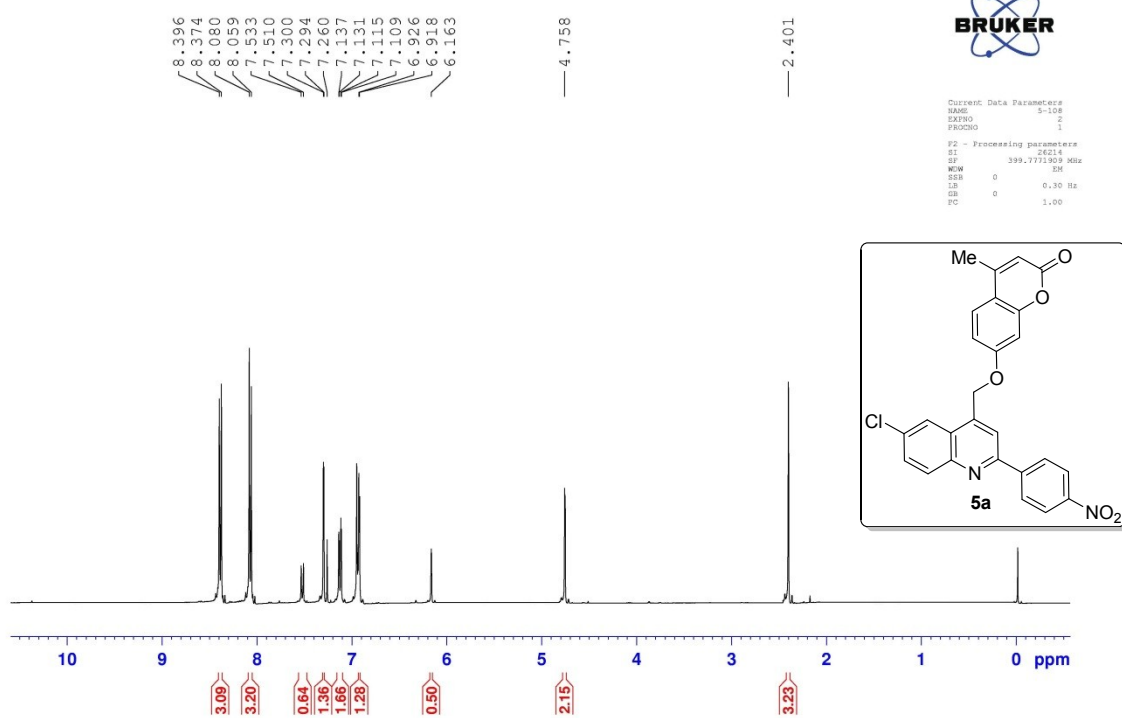

2\_SKJ-5-108

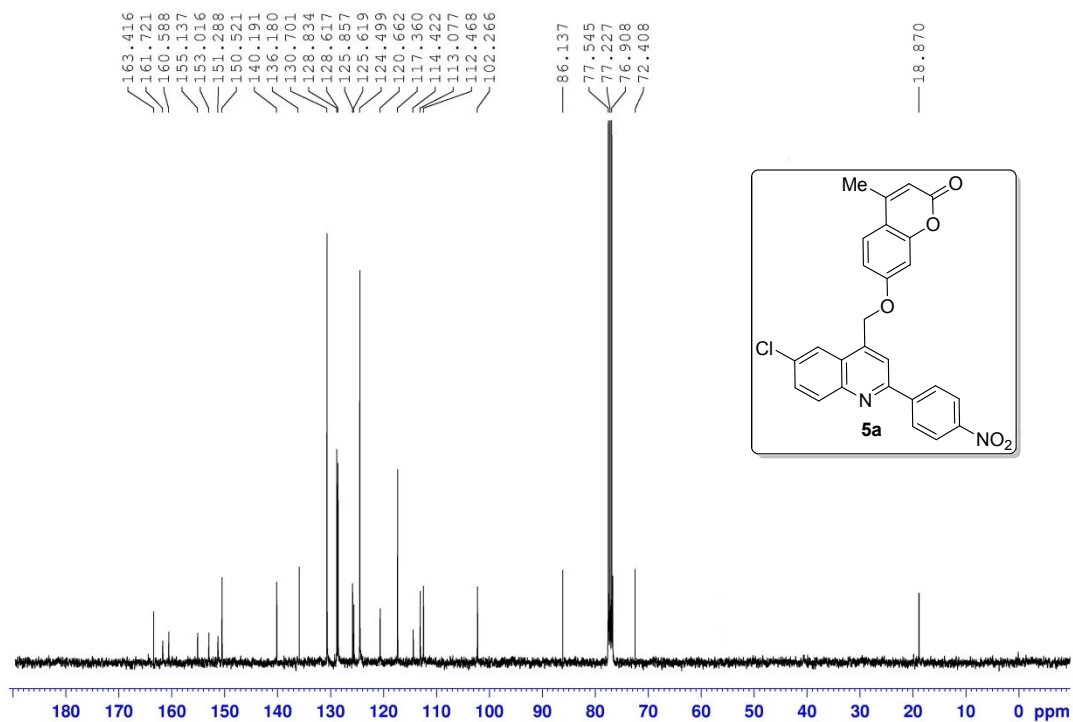

2\_skj-5-104

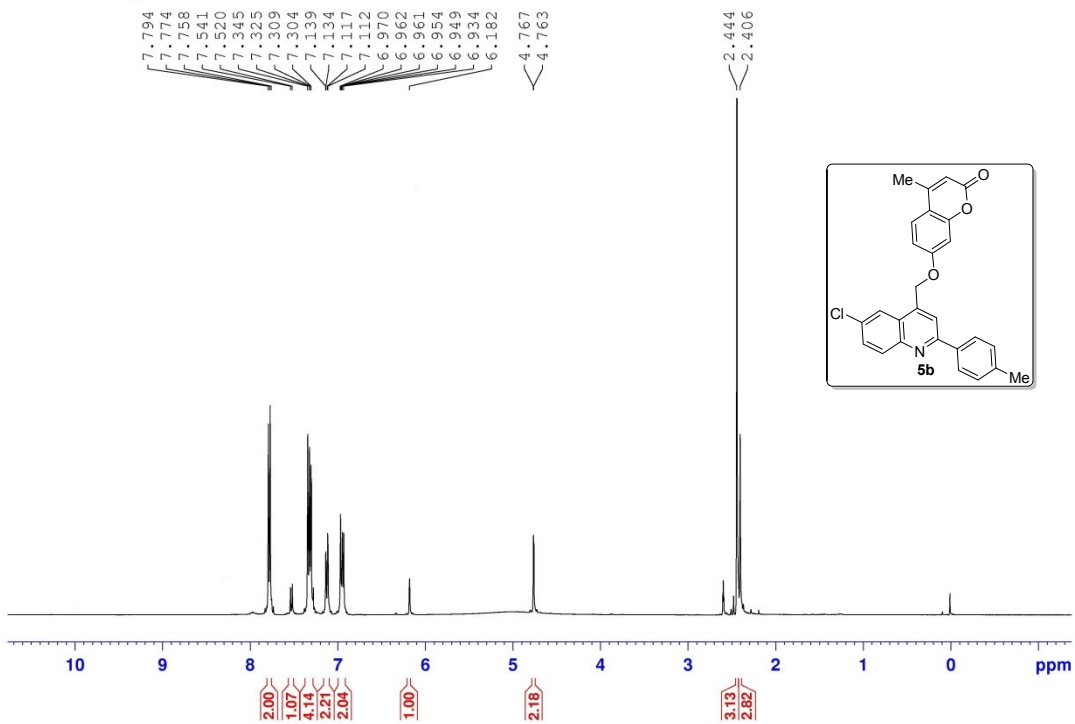

2\_skj-5-104

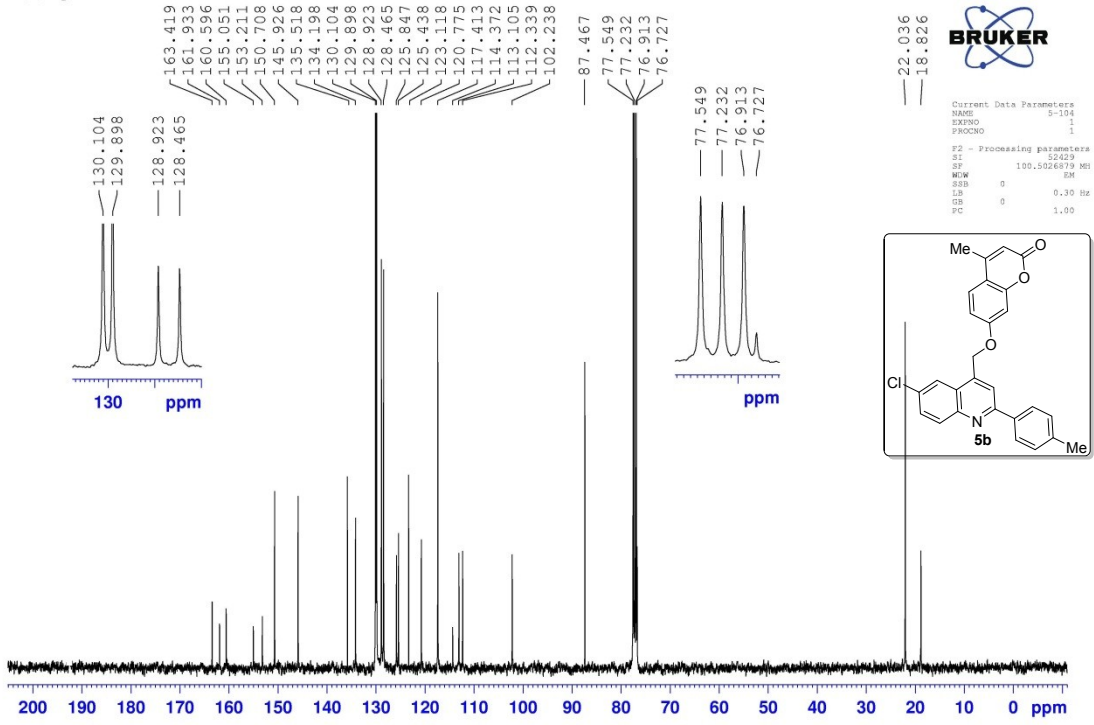

2\_skj-5-105

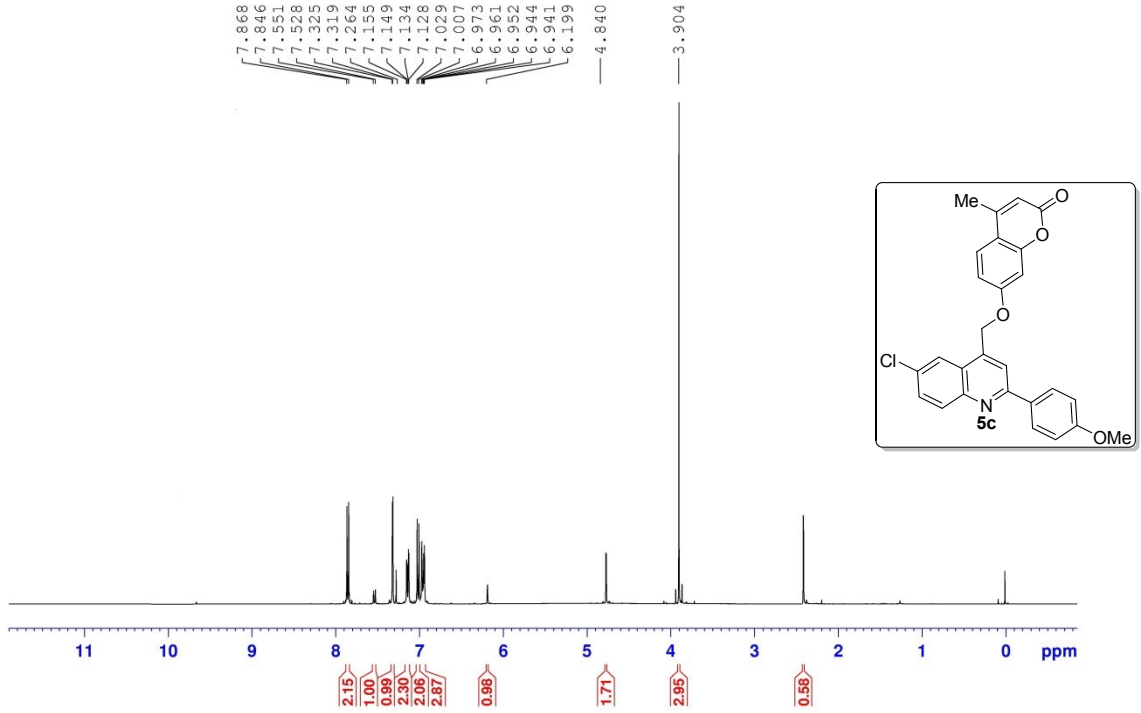

2\_skj-5-105

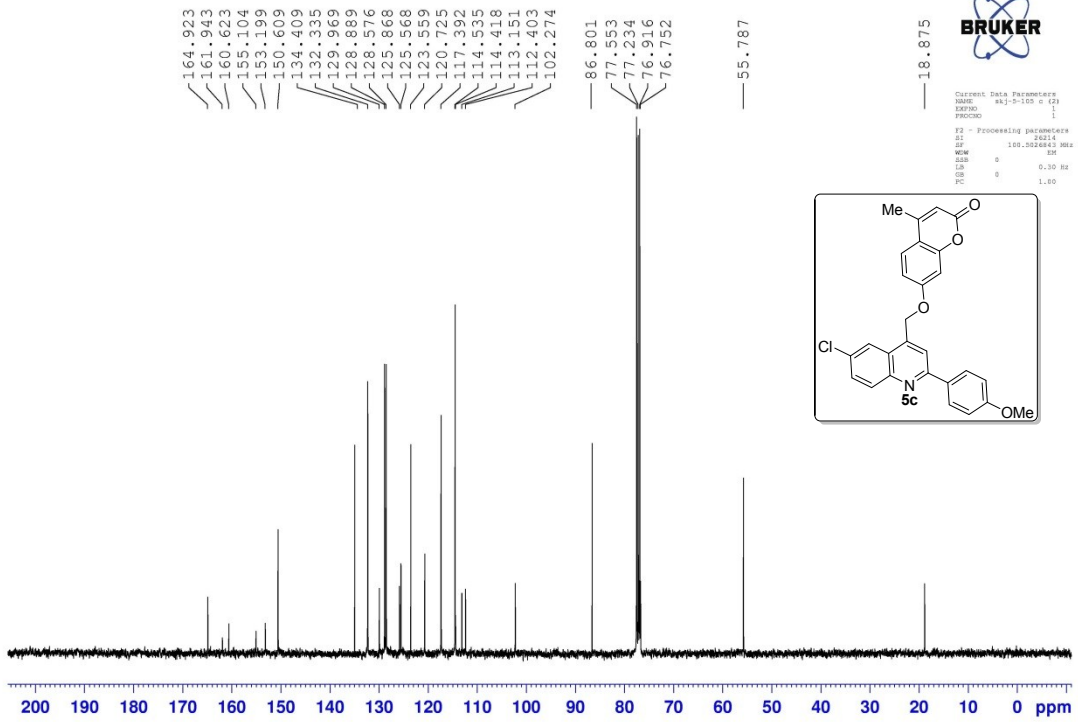

8\_SKJ-5-111

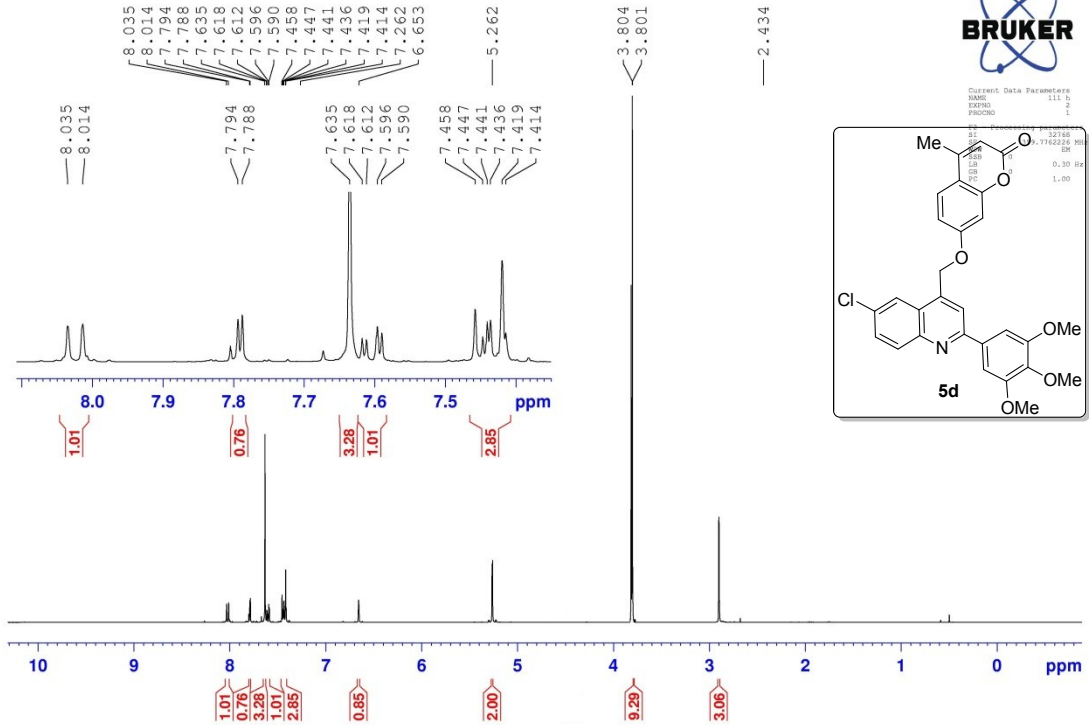



8\_SKJ-5-111

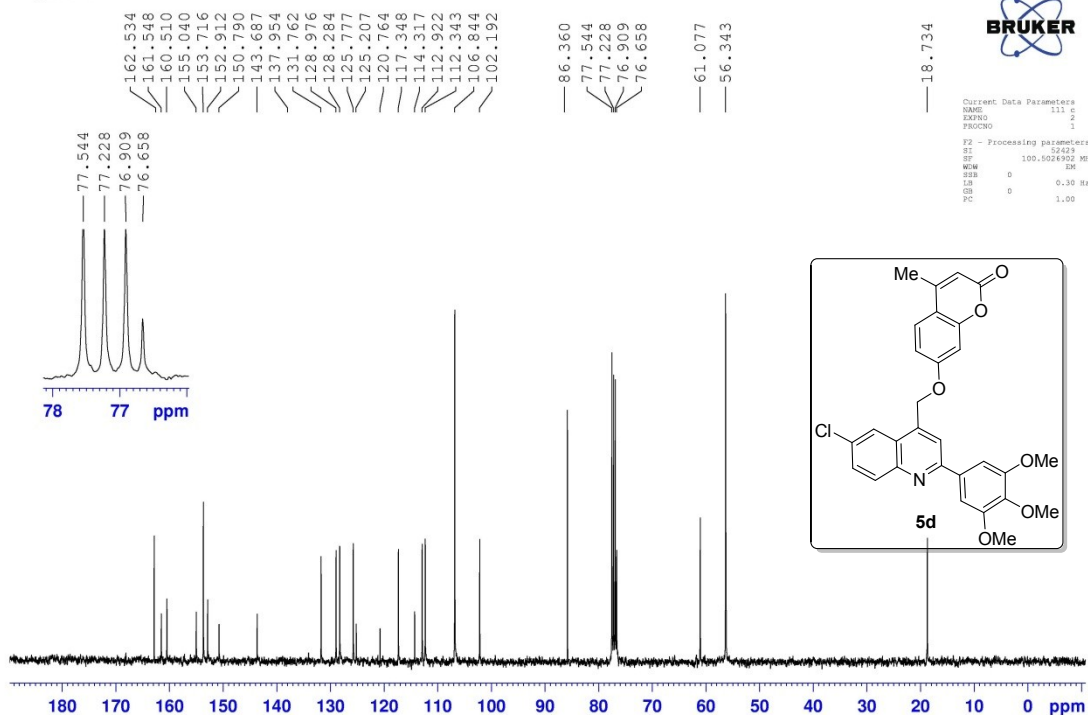

8\_SKJ-5-112b

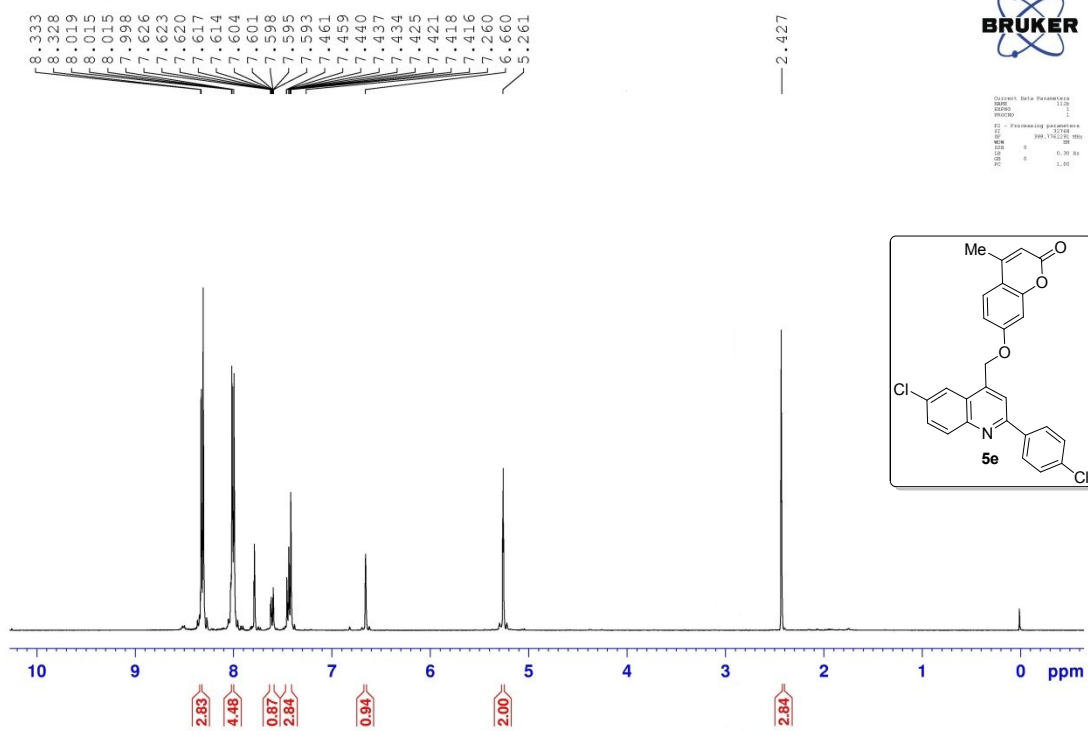



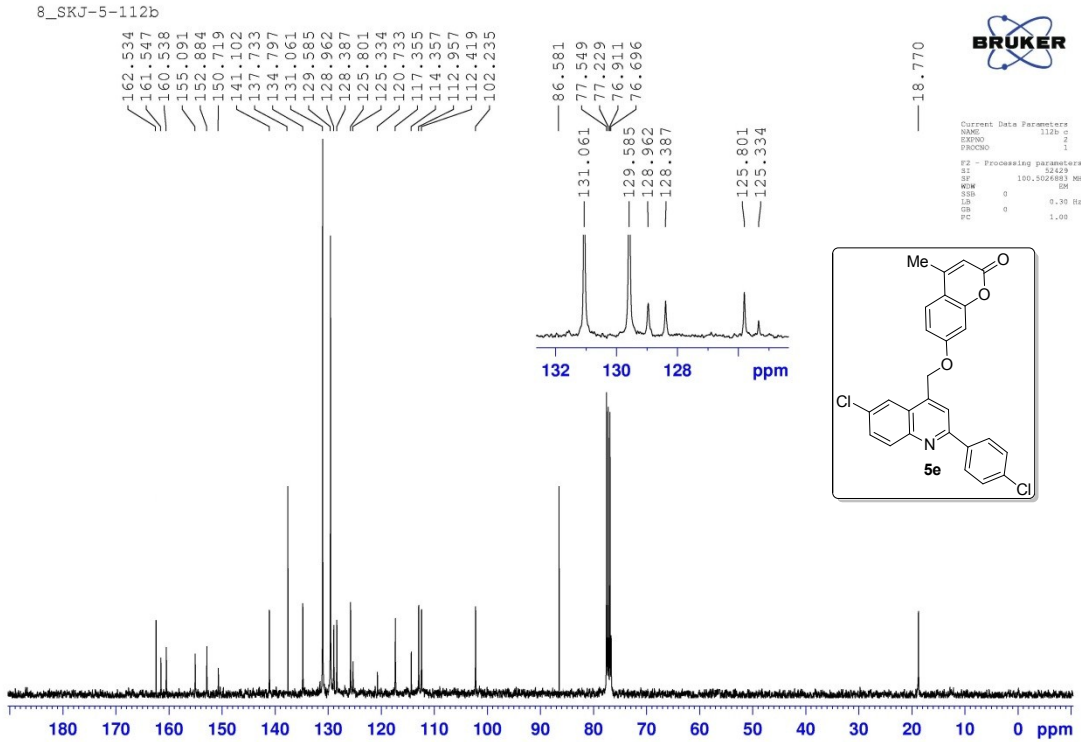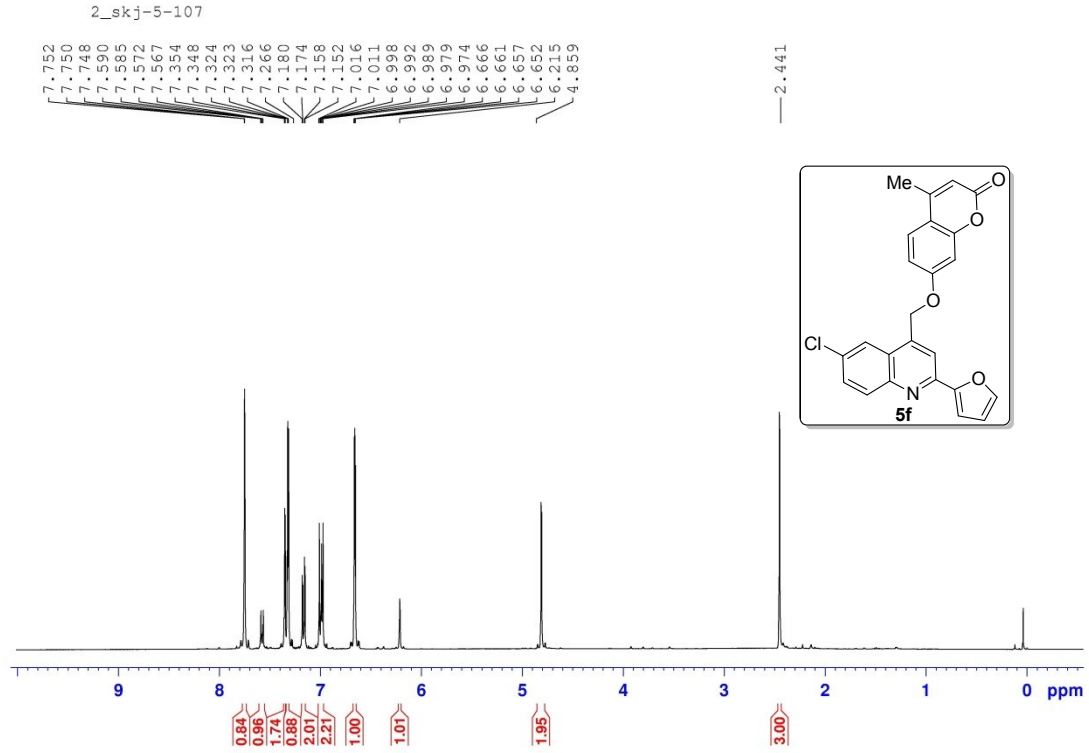

2\_skj-5-107

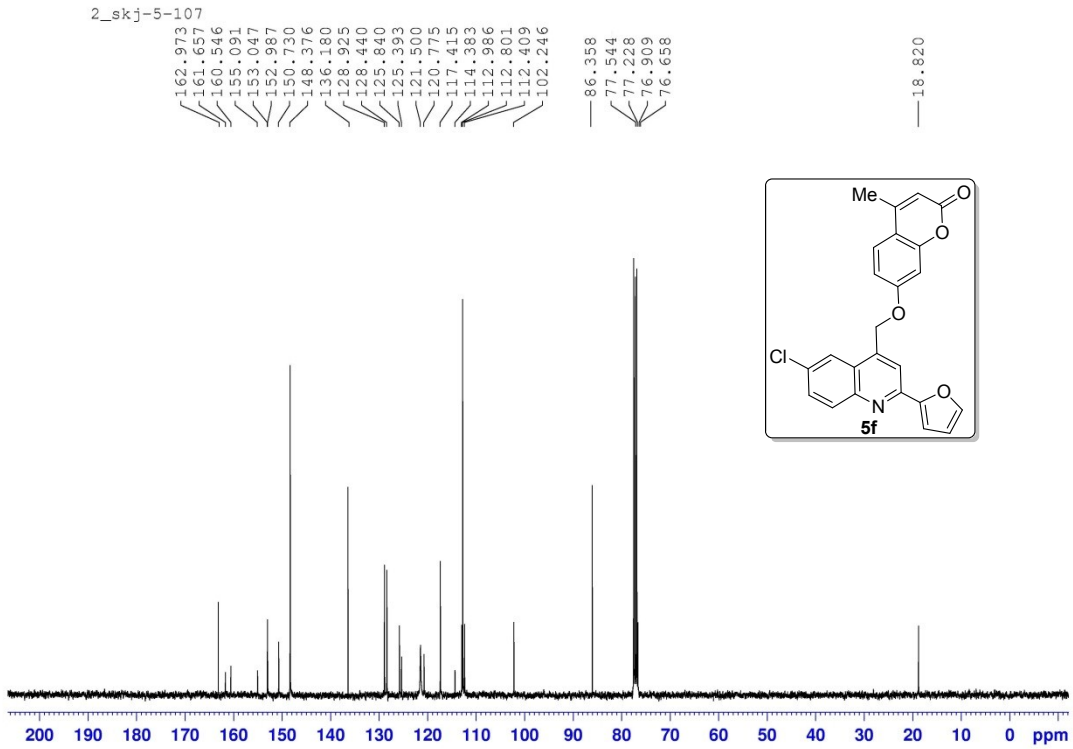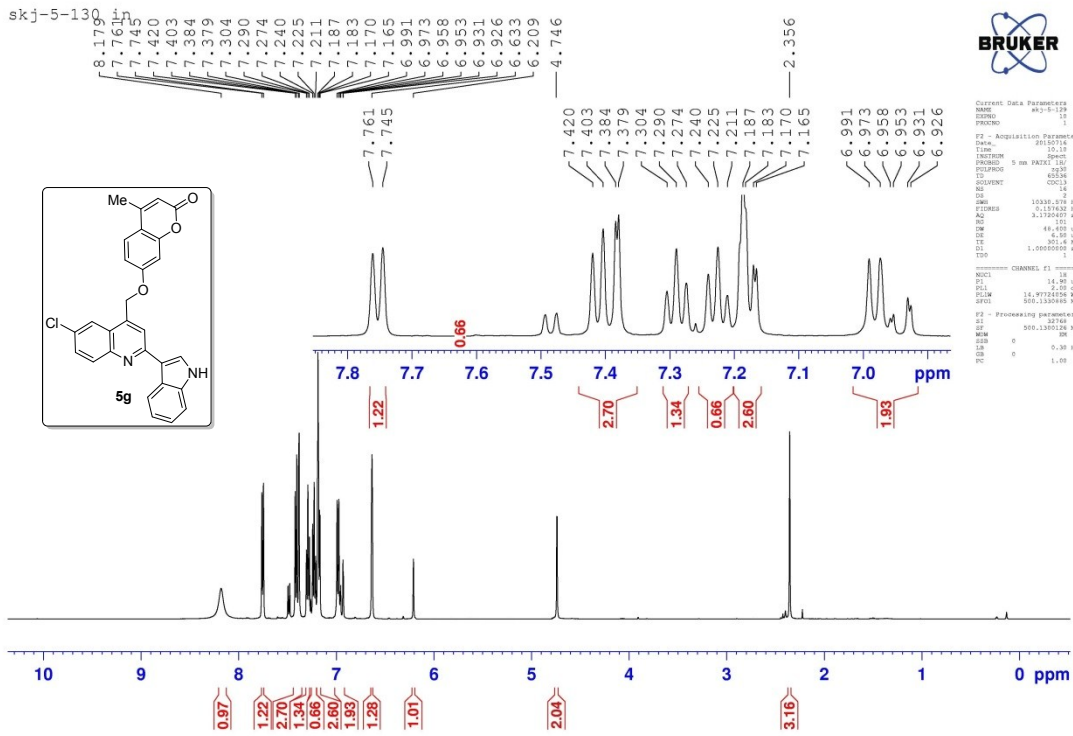

13\_Skj-5-128

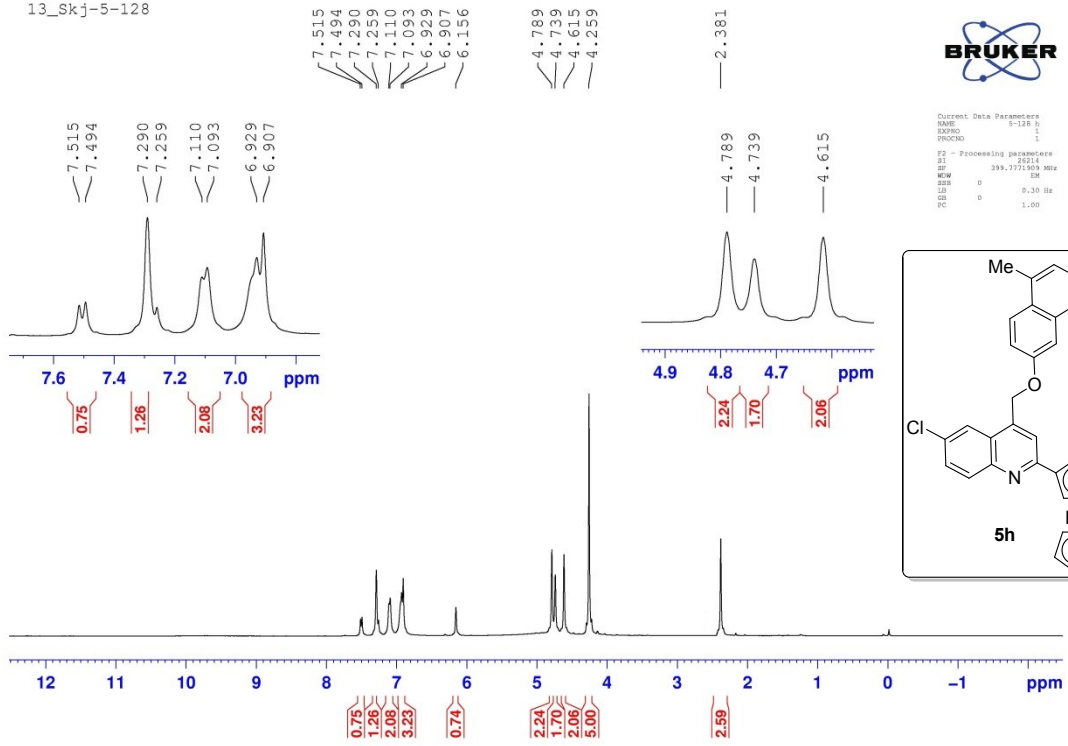

13\_Skj-5-128

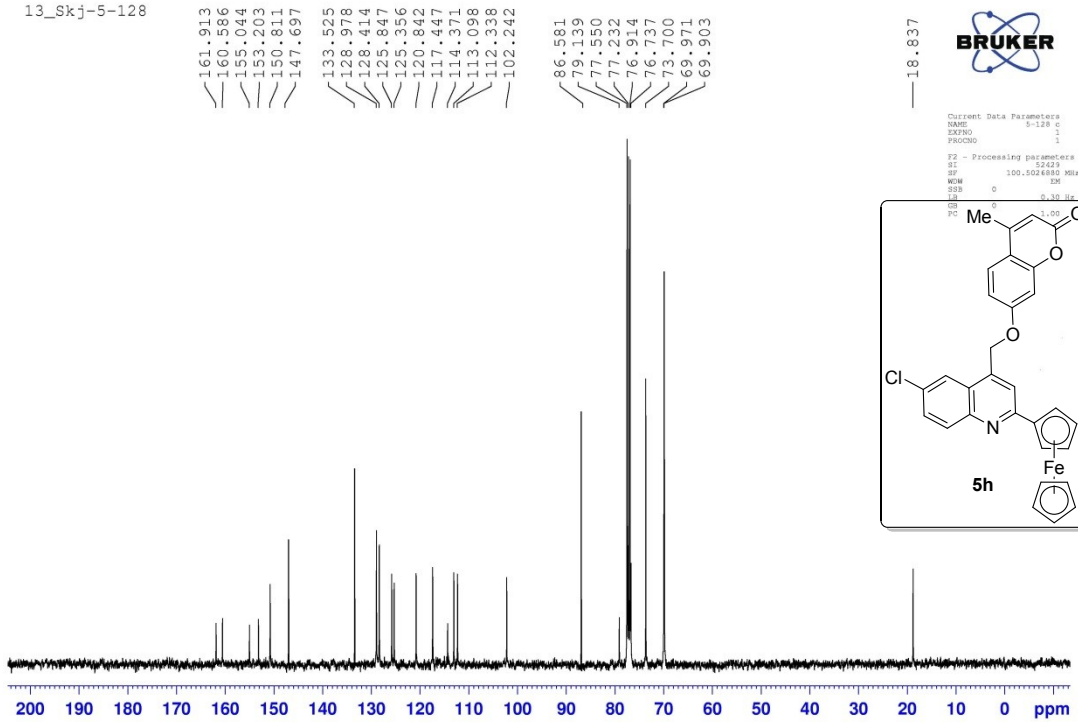

Supplement: c5ra15748j1.pdf [file c5ra15748j1.pdf]
